# Supplementary material
Source: publisher figshare collection journal article supplement (https://tandf.figshare.com/articles/dataset/_/3121987)
Supplement: Supplementary file 2 [file 1]

Archive with 2 entries (2 files):
- Second_Revise_Resubmit_Granger_Causality_in_Mean_Measure_Feburary_2016.pdf
- Second_Revise_Resubmit_Granger_Causality_in_Mean_Measure_Feburary_2016.tex
