# Supplementary material
Source: publisher figshare collection journal article supplement (https://tandf.figshare.com/articles/dataset/_/3121987)
Supplement: Supplementary file 2 [file 1 › Second_Revise_Resubmit_Granger_Causality_in_Mean_Measure_Feburary_2016.tex]

%2multibyte Version: 5.50.0.2960 CodePage: 65001
%\input{tcilatex}
%\usepackage[latin1]{inputenc}
%\input{tcilatex}
%\input{tcilatex}
%\input{tcilatex}
%\input{tcilatex}
%\input{tcilatex}
%\input{tcilatex}
%\input{tcilatex}
%\input{tcilatex}
%\input{tcilatex}
%\input{tcilatex}
%\input{tcilatex}


\documentclass[11pt]{article}
%%%%%%%%%%%%%%%%%%%%%%%%%%%%%%%%%%%%%%%%%%%%%%%%%%%%%%%%%%%%%%%%%%%%%%%%%%%%%%%%%%%%%%%%%%%%%%%%%%%%%%%%%%%%%%%%%%%%%%%%%%%%%%%%%%%%%%%%%%%%%%%%%%%%%%%%%%%%%%%%%%%%%%%%%%%%%%%%%%%%%%%%%%%%%%%%%%%%%%%%%%%%%%%%%%%%%%%%%%%%%%%%%%%%%%%%%%%%%%%%%%%%%%%%%%%%
\usepackage{amssymb}
\usepackage{booktabs}
\usepackage{harvard}
\usepackage{longtable}
\usepackage{amsfonts}
\usepackage{amsmath}
\usepackage{amsmath}
\usepackage{amsmath}
\usepackage{amsmath}
\usepackage{graphicx}
\usepackage{amsmath}
\usepackage[margin=1in]{geometry}
\usepackage{subfigure}

\setcounter{MaxMatrixCols}{10}
%TCIDATA{OutputFilter=LATEX.DLL}
%TCIDATA{Version=5.50.0.2960}
%TCIDATA{Codepage=65001}
%TCIDATA{<META NAME="SaveForMode" CONTENT="1">}
%TCIDATA{BibliographyScheme=BibTeX}
%TCIDATA{LastRevised=Wednesday, February 03, 2016 15:53:29}
%TCIDATA{<META NAME="GraphicsSave" CONTENT="32">}
%TCIDATA{Language=American English}

\newcommand{\R}{\mathbb{R}}
\newcommand{\E}{\mathbb{E}}
\newcommand{\N}{\mathbb{N}}
\newcommand{\I}{\mathbb{I}}
\newcommand{\Z}{\mathbb{Z}}
\newtheorem{theorem}{Theorem}
\newtheorem{acknowledgement}[theorem]{Acknowledgement}
\newtheorem{algorithm}[theorem]{Algorithm}
\newtheorem{axiom}[theorem]{Axiom}
\newtheorem{case}[theorem]{Case}
\newtheorem{claim}[theorem]{Claim}
\newtheorem{conclusion}[theorem]{Conclusion}
\newtheorem{condition}[theorem]{Condition}
\newtheorem{conjecture}[theorem]{Conjecture}
\newtheorem{corollary}{Corollary}
\newtheorem{criterion}{Criterion}
\newtheorem{definition}{Definition}
\newtheorem{example}{Example}
\newtheorem{exercise}[theorem]{Exercise}
\newtheorem{lemma}{Lemma}
\newtheorem{notation}[theorem]{Notation}
\newtheorem{problem}[theorem]{Problem}
\newtheorem{proposition}{Proposition}
\newtheorem{remark}{Remark}
\newtheorem{solution}{Solution}
\newtheorem{summary}[theorem]{Summary}
\newenvironment{proof}[1][Proof]{\textbf{#1.} }{\ \rule{0.5em}{0.5em}}
\newcommand{\cqfd}
{\mbox{}\nolinebreak\hfill\rule{2.5mm}{2.5mm}\medbreak\par}
\renewcommand{\cite}{\citeasnoun}
\geometry{left=0.7in,right=0.7in,top=0.7in,bottom=0.7in}
\renewcommand{\baselinestretch}{1.5}
\input{tcilatex}
\begin{document}

\title{Measuring Nonlinear Granger Causality in Mean\thanks{%
The authors thank two anonymous referees, an Associate Editor, and the
Editor Rong Chen for several useful comments. We would also like to thank
the seminar participants at ESSEC Paris, University of Liverpool, Maastricht
University, and XXXVIII Simposio of the Spanish Economic Association in
Santander, for their very useful comments. Financial support from the
Spanish Ministry of Education through grants \#ECO2010-19357 are also
acknowledged.}}
\author{ Xiaojun Song \thanks{%
Department of Business Statistics and Econometrics, Guanghua School of
Management and Center for Statistical Science, Peking University, Beijing,
100871, China. E-mail: sxj@gsm.pku.edu.cn.} \\
%EndAName
Peking University \and Abderrahim Taamouti\thanks{\textit{Corresponding
author}: Department of Economics and Finance, Durham University Business
School. Address: Mill Hill Lane, Durham, DH1 3LB, UK. TEL: +44-1913345423.
E-mail: abderrahim.taamouti@durham.ac.uk.} \\
%EndAName
Durham University Business School}
\maketitle

\thispagestyle{empty}

\newpage

\thispagestyle{empty} 
%\setlength{\baselineskip}{18pt}\pagestyle{plain} \pagenumbering{arabic} %
%\setcounter{page}{1}\baselineskip=13.5pt

\begin{equation*}
\end{equation*}

\begin{center}
{\LARGE Measuring Nonlinear Granger Causality in Mean}

\begin{eqnarray*}
&& \\
&&
\end{eqnarray*}

\textbf{ABSTRACT}
\end{center}

We propose model-free measures for \emph{Granger} \emph{causality in mean }%
between random variables.\emph{\ }Unlike the existing measures, ours are
able to detect and \emph{quantify} nonlinear causal effects. The new
measures are based on nonparametric regressions and defined as logarithmic
functions of restricted and unrestricted mean square forecast errors. They
are easily and consistently estimated by replacing the unknown mean square
forecast errors by their nonparametric kernel estimates. We derive the
asymptotic normality of nonparametric estimator of causality measures, which
we use to build tests for their statistical significance. We establish the
validity of smoothed local bootstrap that one can use in finite sample
settings to perform statistical tests. Monte Carlo simulations reveal that
the proposed test has good finite sample size and power properties for a
variety of data-generating processes and different sample sizes.

Finally, the empirical importance of measuring nonlinear causality in mean
is also illustrated. We quantify the degree of nonlinear predictability of
equity risk premium using variance risk premium. Our empirical results show
that the variance risk premium is a very good predictor of risk premium at
horizons less than six months. We also find that there is a high degree of
predictability at horizon one-month which can be attributed to a nonlinear
causal effect.

\quad

\noindent \textbf{Keywords}: Granger causality measures; nonlinear causality
in mean; nonparametric estimation; time series; bootstrap; volatility index;
realized volatility; variance risk premium; risk premium.

\quad

\noindent \textbf{Journal of Economic Literature\ classification: }C12; C14;
C15; C19; G1; G12; E3; E4.

\newpage \pagenumbering{arabic} \setcounter{page}{1} \setcounter{footnote}{0}
%TCIMACRO{%
%\TeXButton{\arabic{footnote}}{\renewcommand{\thefootnote}{\arabic{footnote}}}}%
%BeginExpansion
\renewcommand{\thefootnote}{\arabic{footnote}}%
%EndExpansion

\section{Introduction \label{Introduction}}

The concept of causality introduced by Wiener (1956) and Granger (1969)
constitutes a basic notion for analyzing dynamic relationships between time
series. In studying Wiener-Granger causality, predictability is the central
issue which is of great importance to economists, policymakers and
investors. Much research has been devoted to building tests of non-causality%
\emph{\ in mean}. However, once we have concluded that a \textquotedblleft
causal relation\textquotedblright\ is present, it is usually important to
assess the strength of this relationship. Only a few papers have been
proposed to \emph{measure} the causality in mean between the variables of
interest; see Geweke (1982, 1984) and Dufour and Taamouti (2010). Those
papers consider \emph{parametric} \emph{linear} models for the conditional
mean function. Thus, the proposed measures ignore nonlinear causal effects,
which might lead to invalid causal analysis. Hence, we simply cannot use the
existing measures to quantify the strength of nonlinear causality in mean.
The present paper aims to propose model-free measures to quantify nonlinear
causality in mean.

Wiener-Granger analysis distinguishes between three basic types of
causality: from $Y$ to $X$, from $X$ to $Y$, and an instantaneous causality,
where $X$ and $Y$ are the variables of interest. In practice, it is possible
that all three causality relations coexist simultaneously. Hence the
importance of providing tools that quantify and compare the degree of these
causalities. Unfortunately, causality tests fail to accomplish this task,
because they only provide evidence on the presence of causality. A large
effect may not be statistically significant (at a given level), and a
statistically significant effect may not be \textquotedblleft
large\textquotedblright\ from an economic viewpoint (or more generally from
the viewpoint of the subject at hand) or relevant for decision making. As
emphasized by McCloskey and Ziliak (1996), it is crucial to distinguish
between the numerical value of the measure and its statistical significance.
Hence, beyond accepting or rejecting non-causality hypotheses -- which state
that certain variables do not help forecasting other variables -- we wish to
assess the magnitude of the forecast improvement, where the latter is
defined in terms of some loss function (mean square forecast errors). Even
if the hypothesis of no improvement (non-causality) cannot be rejected from
looking at the available data (for example, because the sample size or the
structure of the process does allow for high test power), sizeable
improvements may remain consistent with the same data. Or, by contrast, a
statistically significant improvement -- which may easily be produced by a
large data set - may not be relevant from a practical viewpoint.

The topic of measuring Granger causality has attracted much less attention.
Furthermore, most of the existing measures focus on linear causality in
mean, thus, those measures can not be applied in the presence of \emph{%
nonlinear} causality in mean. Geweke (1982, 1984) introduce measures of
causality in mean based on \emph{linear parametric} autoregressive models.
Dufour and Taamouti (2010) extend Geweke's (1982, 1984) work to propose
measures for short and long run causality in mean using \emph{parametric}
ARMA models. Gouri\'{e}roux et al. (1987) build measures of causality based
on Kullback information criterion and use a \emph{parametric} approach for
the estimation of their measures. Polasek (1994, 2002) show how causality
measures can be computed using Akaike Information Criterion ($AIC$) and a
Bayesian approach. Taamouti et al. (2014) have recently proposed a
nonparametric estimator and test for Granger causality measures that
quantify Granger causality in \emph{distribution}. However, the main issue
of Taamouti et al.'s (2014) measures is that they are not informative about
the level(s) (mean, variance, other high-order moments, quantiles) of
distribution where the causality exists.

We introduce new model-free measures to quantify nonlinear Granger causality
in mean. The new measures are defined in the context of nonparametric
regressions as logarithmic functions of restricted and unrestricted mean
square forecast errors. A consistent nonparametric estimator of these
measures is defined in terms of Nadaraya-Watson kernel estimators of mean
square forecast errors. We establish the asymptotic normality of this
estimator that we use to build tests for statistical significance of
measures. We also show the validity of smoothed local bootstrap that we
apply to perform statistical tests in finite sample settings. Furthermore, a
Monte Carlo simulation study is performed to investigate the finite sample
properties (size and power) of the proposed nonparametric test and the
results reveal that the latter behaves well for a variety of typical data
generating processes\textit{.}

Moreover, since testing that the value of measure is equal to zero is
equivalent to testing for non-causality in mean, we consider an additional
simulation exercise to compare the empirical size and power of our test with
those of nonparametric test of Granger non-causality in mean introduced by
Nishiyama et al. (2011). Simulation results indicate that our test has
comparable size, but better power than Nishiyama et al.'s (2011) test.

Finally,\ we apply our nonparametric causality measures to quantify the
degree of nonlinear predictability of equity risk premium using what is
known as variance risk premium; see Bollerslev et al. (2009). The latter is
defined as the difference between risk-neutral and objective expectations of
realized variance. Our results indicate that the variance risk premium is a
good predictor of risk premium at horizons less than six months. Contrary to
Bollerslev et al. (2009), we find that there is a high degree of
predictability at horizon one-month which can be attributed to a nonlinear
causal effect.

The plan of the paper is as follows. Section \ref{sec: Motivation} provides
the motivation for considering measures for nonlinear Granger causality in
mean. Section \ref{sec: Framework} presents the general theoretical
framework which underlies the definition of causality in mean. In Section %
\ref{Causality measures} and \ref{nonparametric measures}, we define the
theoretical nonparametric measures of Granger causality in mean. In Section %
\ref{Estimation and inference} we introduce a consistent nonparametric
estimator of causality measures based on kernel estimation of mean-square
forecast errors of restricted and unrestricted nonparametric regressions. We
also establish the asymptotic distribution of nonparametric estimator of
causality in mean measures and discuss the asymptotic validity of a smoothed
local bootstrap assisted test. In Section \ref{sec: Extension} we extend our
results to the case where the random variables of interest are multivariate.
In Section \ref{sec: Monte-Carlo simulations} we provide a simulation
exercise to investigate the finite sample properties of our test of
causality measures. Section \ref{sec: Empirical applications} is devoted to
an empirical application and the conclusion relating to the results is given
in Section \ref{sec: Conclusion}. Additional data generating processes for
simulations and proofs of the asymptotic results are presented in the
Technical Appendix, which is available online.

\section{Motivation \label{sec: Motivation}}

The causality measures that we consider here constitute a generalization of
those developed by Geweke (1982, 1984) and others. The existing measures
quantify the effect of one variable $Y$ on another variable $X$ assuming
that the regression function linking the two variables of interest is \emph{%
known} and linear. The significance of such measures is limited in the
presence of unknown regression functions and in the presence of nonlinear
causality in mean.

We propose measures of causality between random variables based on
nonparametric regression functions. Such measures detect and quantify
nonlinear causality in mean. To see the importance of these causality
measures, consider the following example.

\begin{example}
\lbrack Brock (1991)] \label{Ex: Example 1}Consider the following nonlinear
regression model%
\begin{equation}
X_{t+1}=\beta \text{ }Y_{t}\cdot X_{t}+\varepsilon _{t+1}\text{{$,$}}
\label{Equation1}
\end{equation}%
where $\left\{ Y_{t}\right\} $ and $\left\{ X_{t}\right\} $ are mutually
independent and individually i.i.d. $N(0,1)$, and $\beta $ denotes a
parameter. Equation (\ref{Equation1}) shows that $Y$ nonlinearly causes the
conditional mean of $X,$ since $X_{t+1}$ depends nonlinearly on the past
value of $Y_{t}$. However, since all autocorrelations and cross correlations
between $X$ and $Y$ are zero, $Y$ does not linearly cause the conditional
mean of $X.$ Thus, this example illustrates the case where the causality in
mean does not exist linearly, but it does nonlinearly. But,\textit{\ how can
we measure the degree of this nonlinear causality in mean? Existing measures
do not answer this question.}
\end{example}

Generally speaking, the existing measures of linear Granger causality in
mean might have low power in detecting certain kinds of nonlinear causal
effects. Formally, let us assume that the true conditional mean of random
variable $X$ is a nonlinear function of random variable $Y$%
\begin{equation}
X_{t+1}=\mu +\beta \text{ }f\left( Y_{t}\right) +\alpha X_{t}+u_{t+1}\text{{$%
,$}}  \label{Equation1.2}
\end{equation}%
where $u_{t+1}$\ is an i.i.d. process with mean zero and variance $\sigma
^{2}$. Let us now approximate the nonlinear relationship in (\ref%
{Equation1.2}) by a linear one, using a Taylor expansion around zero:%
\begin{equation}
X_{t+1}\simeq \mu +\beta \text{ }\left[ f\left( 0\right) +Y_{t}f^{\prime
}\left( 0\right) \right] +\alpha X_{t}+u_{t+1}=\eta +\lambda Y_{t}+\alpha
X_{t}+u_{t+1},  \label{Equation2}
\end{equation}%
where the new constant $\eta $ is equal to $\mu +\beta f\left( 0\right) $
and the new slope $\lambda $ is equal to $\beta f^{\prime }\left( 0\right) .$
Equation (\ref{Equation2}) shows that the impact of $Y$ on conditional mean
of $X$ depends on the first derivative of $f$ evaluated at zero. Thus, if $%
f^{\prime }\left( 0\right) $ is zero or close to zero, then the above linear
approximation has no power or low power in detecting nonlinear relationship
between $X$ and $Y$. Broadly speaking, a Taylor expansion of $f\left(
Y_{t}\right) $ around any value $a$ such that $f^{\prime }\left( a\right) $
is zero or close to zero will lead to low power in detecting nonlinear
relationship between $X$ and $Y.$ Hence the importance of using
nonparametric regression to build measures of nonlinear Granger causality in
mean.

\section{Framework \label{sec: Framework}}

The notion of non-causality studied here is defined in terms of
orthogonality conditions between subspaces of a Hilbert space of random
variables with finite second moments. We denote $L^{2}\equiv L^{2}(\Omega ,$%
\thinspace $\mathcal{A},$\thinspace $Q)$ a Hilbert space of real random
variables with finite second moments, defined on a common probability space $%
(\Omega ,$\thinspace $\mathcal{A},$\thinspace $Q)$. If $E$ and $F$ are two
Hilbert subspaces of $L^{2},$ we denote $E+F$ the smallest subspace of $%
L^{2} $ which contains both $E$ and $F.$

\textquotedblleft Information\textquotedblright\ is represented here by
nondecreasing sequences of Hilbert subspaces of $L^{2}.$ In particular, we
consider a sequence $I$ of \textquotedblleft reference information
sets\textquotedblright\ $I(t),$ 
\begin{equation}
I=\{I(t):t\in \mathbb{Z\,},\,t>\omega \}\;\text{with\ }t<t^{\prime
}\Rightarrow I(t)\subseteq I(t^{\prime })\text{ for all }t>\omega \,,
\label{eqLC.1}
\end{equation}%
where $I(t)$ is a Hilbert subspace of $L^{2},$ $\omega \in \mathbb{Z}\cup
\{-\infty \}$ represents a \textquotedblleft starting
point\textquotedblright , and $\mathbb{Z}$ is the set of the integers. The
\textquotedblleft starting point\textquotedblright\ $\omega $ is typically
equal to a finite initial date (such as $\omega =-1,$ $0$ or $1$) or to $%
-\infty ;$ in the latter case $I(t)$ is defined for all $t\in \mathbb{Z}.$
We also consider two stochastic processes 
\begin{equation*}
X=\left\{ X_{t}:t\in \mathbb{Z},\,t>\omega \right\} \,,\,\ Y=\left\{
Y_{t}:t\in \mathbb{Z},\,t>\omega \right\} ,
\end{equation*}%
where%
\begin{eqnarray*}
X_{t} &=&(x_{1,t},\,\ldots \,,\,x_{d_{1},t})^{^{\prime }},\;x_{i,t}\in L^{2},%
\text{\quad }i=1,\,\ldots \,,\,d_{1}\,,\text{ }d_{1}\geq 1, \\
Y_{t} &=&(y_{1,t},\,\ldots \,,\,y_{d_{2},t})^{^{\prime }},\;y_{i,t}\in L^{2},%
\text{\quad }i=1,\,\ldots \,,\,d_{2}\,,\text{ }d_{2}\geq 1,
\end{eqnarray*}%
and a (possibly empty) Hilbert subspace $H$ of $L^{2},$ whose elements
represent information available at any time, such as time independent
variables (\emph{e.g.}, the constant in a regression model) and
deterministic processes (e.g., deterministic trends). We denote $X(\omega
,\,t]$ the Hilbert space spanned by the components $x_{i,\tau },i=1,\ldots
,d_{1},$ of $X_{\tau },$ $\omega <\tau \leq t,$ and similarly for $Y(\omega
,\,t]:$ $X(\omega ,\,t]$ and $Y(\omega ,\,t]$ represent the information
contained in the history of the variables $X$ and $Y$ respectively up to
time $t$. Finally, the information sets obtained by \textquotedblleft
adding\textquotedblright\ $X(\omega ,\,t]$ to $I(t)$ and $Y(\omega ,\,t]$ to 
$I_{X}(t)$ are defined as 
\begin{equation}
I_{X}(t)=I(t)+X(\omega ,\,t]\,,\;I_{XY}(t)=I_{X}(t)+Y(\omega ,\,t].
\label{eq: IX(t)}
\end{equation}

For any information set $B_{t}$ [some Hilbert subspace of $L^{2}$], we
denote $P[x_{i,t+1}|\,B_{t}]$ the best (nonlinear) forecast of $x_{i,t+1}$
based on the information set $B_{t},$\ 
\begin{equation*}
u[x_{i,t+1}|\,B_{t}]=x_{i,t+1}-P[x_{i,t+1}|\,B_{t}]
\end{equation*}%
the corresponding prediction error, and $\sigma ^{2}[x_{i,t+1}\,|\,B_{t}]=%
\mathsf{E}\big\{u[x_{i,t+1}|\,B_{t}]^{2}\big\}.$ Then, the best forecast of $%
X_{t+1}$ is 
\begin{equation*}
P[X_{t+1}|\,B_{t}]=\big(P[x_{1,t+1}\,|\,B_{t}],\,\ldots
\,,\,P[x_{d_{1},t+1}\,|\,B_{t}]\big)^{\prime },\,
\end{equation*}%
the corresponding vector of prediction errors is%
\begin{equation}
U[X_{t+1}\,|\,B_{t}]=\big(u[x_{1,t+1}\,|\,B_{t}],\,\ldots
\,,\,u[x_{d_{1},t+1}\,|\,B_{t}]\big)^{^{\prime }},\,  \label{eq: U(t+1)}
\end{equation}%
and the corresponding matrix of second moments is 
\begin{equation}
\Sigma \lbrack X_{t+1}\,|\,B_{t}]=\mathsf{E}\big\{U[X_{t+1}\,|\,B_{t}]%
\,U[X_{t+1}\,|\,B_{t}]^{^{\prime }}\big\}.  \label{eq: Sigma[U(t+1)]}
\end{equation}%
Provided $B_{t}$ contains a constant, $\Sigma \lbrack X_{t+1}\,|\,B_{t}]$ is
covariance matrix of $U[X_{t+1}\,|\,B_{t}].$ Each component $%
P[x_{i,t+1}\,|\,B_{t}]$ of $P[X_{t+1}\,|\,B_{t}]$ is the orthogonal
projection of $x_{i,t+1}$ on the subspace $B_{t}.$

Following the definitions in Dufour and Taamouti (2010), characterization of
non-causality between $X$ and $Y$ can be expressed in terms of the variance
of the forecast errors.

\begin{definition}
\label{Def: Non-causality from Y to X} (\emph{Covariance Characterization of
Non-causality}). $Y$ does not cause $X$ given $I$ iff 
\begin{equation*}
\det \Sigma \lbrack X_{t+1}\,|\,I_{X}(t)]=\det \Sigma \lbrack
X_{t+1}\,|\,I_{XY}(t)]\,,\;\forall t>\omega ,
\end{equation*}%
where $\Sigma \lbrack X_{t+1}\,|\,\cdot \,]$\ is defined in $($\ref{eq:
Sigma[U(t+1)]}$).$ Similarly, $X$ does not cause $Y$ given $I$ iff 
\begin{equation*}
\det \Sigma \lbrack Y_{t+1}\,|\,I_{Y}(t)]=\det \Sigma \lbrack
Y_{t+1}\,|\,I_{XY}(t)]\,,\;\forall t>\omega ,
\end{equation*}%
where $\Sigma \lbrack Y_{t+1}\,|\,\cdot \,]=\mathsf{E}\big\{%
U[Y_{t+1}\,|\,\cdot ]\,U[Y_{t+1}\,|\,\cdot ]^{^{\prime }}\big\}.$
\end{definition}

This definition means that $Y$ causes $X$ (resp. $X$ causes $Y$) if the past
of $Y$ (resp. $X$) improves the forecast of $X_{t+1}$ (resp. $Y_{t+1}$)
based on the information in $I(t)$ and $X(\omega ,\,t]$ (resp. $Y(\omega
,\,t]$).

\section{Causality measures \label{Causality measures}}

The causality measures that we propose here are defined using similar
measure functions as in Geweke (1982, 1984) and Dufour and Taamouti (2010).
Important properties of these measures include: (i) they are non-negative,
and (ii) they cancel only when there is no causality. Specifically, we
propose the following causality measures where by convention $\ln (0/0)=0$
and $\ln (x/0)=+\infty $ for $x>0.$

\begin{definition}
\label{Def: Mean-square causality measure relative to an information set} (%
\emph{Mean-Square Causality Measures}). The function\ 
\begin{equation}
C({Y}\rightarrow {X\,|\,I})=\ln \text{{$\left[ \frac{\det \Sigma \lbrack
X_{t+1}\,|\,I_{X}(t)]}{\det \Sigma \lbrack X_{t+1}\,|\,I_{XY}(t)]}\right] $}}
\label{eq: Cond causality measure}
\end{equation}%
defines the \emph{mean-square causality measure} from $Y$ to $X,$ given $I.$
Similarly, the function%
\begin{equation*}
C({X}\rightarrow Y{\,|\,I})=\ln \text{{$\left[ \frac{\det \Sigma \lbrack
Y_{t+1}\,|\,I_{Y}(t)]}{\det \Sigma \lbrack Y_{t+1}\,|\,I_{XY}(t)]}\right] $}}
\end{equation*}%
defines the \emph{mean-square causality measure} from $X$ to $Y,$ given $I.$
\end{definition}

Since we only consider mean-square measures, the term \textquotedblleft mean
square causality measure\textquotedblright\ will be abbreviated to
\textquotedblleft causality measure\textquotedblright . Clearly, $C({%
Y\rightarrow X\,|\,I})=0$ (resp. $C({X\rightarrow Y\,|\,I})=0$) if $Y(\omega
,\,t]\subseteq I_{X}(t)$ (resp. $X(\omega ,\,t]\subseteq I_{Y}(t)$)$,$ so $C(%
{Y\rightarrow X\,|\,I})$ (resp. $C({X\rightarrow Y|\,I})$) provides useful
information mainly when $Y(\omega ,\,t]\nsubseteq I_{X}(t)$ (resp. $X(\omega
,\,t]\nsubseteq I_{Y}(t)$)$.$ For $d_{1}=d_{2}=1,$ Definition \ref{Def:
Mean-square causality measure relative to an information set} reduces to 
\begin{equation*}
C({Y}\rightarrow {X\,|\,I})=\text{{$\ln \left[ \frac{\sigma
^{2}[X_{t+1}\,|I_{X}(t)]}{\sigma ^{2}[X_{t+1}\,|\,I_{XY}(t)]}\right] \,,$ }}%
C({X}\rightarrow Y{\,|\,I})=\text{{$\ln \left[ \frac{\sigma
^{2}[Y_{t+1}\,|I_{Y}(t)]}{\sigma ^{2}[Y_{t+1}\,|\,I_{XY}(t)]}\right] .$}}
\end{equation*}%
$C({Y\rightarrow X\,|\,}I)$ (resp. $C({X\rightarrow Y\,|\,}I)$) measures the
degree of causal effect from $Y$ to $X$ (resp. $X$ to $Y$) given $I$ and the
past of $Y$ (resp. $X$)$.$ In terms of predictability, this can be viewed as
the amount of information brought by the past of $Y$ (resp. $X$) which can
improve the forecast of $X_{t+1}$ (resp. $Y_{t+1}$)$.$ We now define an
instantaneous causality measure between $X$ and $Y$ as follows.

\begin{definition}
\label{Def: Measure of instantaneous causality} (\emph{Mean-Square
Instantaneous Causality Measure}). The function 
\begin{equation*}
C({X-Y\,|\,I})=\text{{$\ln \left[ \frac{\det \Sigma \lbrack
X_{t+1}\,|\,I_{XY}(t)]\text{ }\det \Sigma \lbrack Y_{t+1}\,|\,I_{XY}(t)]}{%
\det \Sigma \lbrack \big(X_{t+1},\,Y_{t+1}\big)\,|\,I_{XY}(t)]}\right] ,$}}
\end{equation*}%
where $\Sigma \lbrack \left( X_{t+1},\ Y_{t+1}\right) \,|\,I_{XY}(t)]=%
\mathsf{E}\big\{U[Z_{t+1}\,|\,I_{XY}(t)]U[Z_{t+1}\,|\,I_{XY}(t)]^{^{\prime }}%
\big\}$ and $Z_{t}=\big(X_{t}^{\prime },\,Y_{t}^{\prime }\big)^{\prime },$
defines the \emph{mean-square instantaneous causality measure} between $X$
and $Y.$
\end{definition}

For $d_{1}=d_{2}=1$ and provided $\,I(t)$ includes a constant variable, we
have:%
\begin{eqnarray*}
\det \Sigma \lbrack \big(X_{t+1},\,Y_{t+1}\big)\,|\,I_{XY}(t)] &=&\sigma
^{2}[X_{t+1}\,|\,I_{XY}(t)]\,\sigma ^{2}[Y_{t+1}\,|\,I_{XY}(t)] \\
&&-\big(\mathsf{cov}[X_{t+1},\,Y_{t+1}\,|\,I_{XY}(t)]\big)^{2}\,,
\end{eqnarray*}%
so that 
\begin{equation}
C({X-Y\,|\,I})=\text{{$\ln \left[ \frac{1}{1-\rho \lbrack
X_{t+1},\,Y_{t+1}\,|\,I_{XY}(t)]^{2}}\right] ,$}}
\label{eq: instantanouscausality}
\end{equation}%
where 
\begin{equation*}
\rho \lbrack X_{t+1},\,Y_{t+1}\,|\,I_{XY}(t)]=\frac{\mathsf{cov}%
[X_{t+1},\,Y_{t+1}\,|\,I_{XY}(t)]}{\sigma \lbrack
X_{t+1}\,|\,I_{XY}(t)]\sigma \lbrack Y_{t+1}\,|\,I_{XY}(t)]}\,.
\end{equation*}%
is the conditional correlation coefficient between $X_{t+1}$ and $Y_{t+1}$
given the information set $I_{XY}(t).$ Thus, instantaneous causality
increases with the absolute value of the conditional correlation coefficient.

We also define a measure of dependence between $X$ and $Y$. This will enable
one to check whether\thinspace the processes $X$ and $Y$ must be considered
together or whether they can be treated separately.

\begin{definition}
\label{Def: Dependence measure} (\emph{Measure of Dependence}). The function 
\begin{equation}
C(X,\,Y\,|\,I)=C(X\rightarrow Y{\,|\,}I)+C(Y\rightarrow X{\,|\,}I)+C(X{-}Y{%
\,|\,}I)\,  \label{decomposition}
\end{equation}%
defines the \emph{intensity} of the dependence between $X$ and $Y,$ given $%
I. $
\end{definition}

It is easy to see that the intensity of the dependence between $X$ and $Y$
can be written in the alternative form:%
\begin{equation*}
C(X{,\,}Y{\,|\,}I)=\text{$\ln \left[ \frac{\det \Sigma \lbrack
X_{t+1}\,|\,I_{X}(t)]\text{ }\det \Sigma \lbrack Y_{t+1}\,|\,I_{Y}(t)]}{\det
\Sigma \lbrack \big(X_{t+1},\,Y_{t+1}\big)\,|\,I_{XY}(t)]}\right] ,$}
\end{equation*}%
where $I_{Y}(t)$ represents the Hilbert subspace spanned by the components
of $Y_{t}$ and similarly for $I_{X}(t).$

\section{Causality measures for nonparametric regression models \label%
{nonparametric measures}}

Let $\left\{ \left( X_{t},Y_{t}\right) \in {\mathbb{R}}\times \mathbb{%
R\equiv R}^{2},\text{ }t=0,...,T\right\} $ be a sample of stationary
stochastic process in $\mathbb{R}^{2}$. For simplicity of exposition, we
consider univariate Markov processes of order one. Later, see Section \ref%
{sec: Extension}, we will extend the results to the case where the variables 
$X$ and $Y$ can be multivariate Markov processes of any order\emph{\ p, }for 
$p\geq 1.$

We now focus on the following bivariate nonparametric regression%
\begin{equation}
Z_{t+1}=\Phi \left( Z_{t}\right) +u_{t+1},  \label{jointregression}
\end{equation}%
where $Z_{t+1}=\big(X_{t+1},\,Y_{t+1}\big)^{\prime }$, $\Phi \left(
Z_{t}\right) $ is an unknown function of $Z_{t}$ such that $\Phi \left(
Z_{t}\right) =E\left[ \left. Z_{t+1}\right\vert Z_{t}\right] ,$ and $u_{t+1}=%
\big(u_{t+1}^{X},\,u_{t+1}^{Y}\big)^{\prime }$ is an error term with $E\left[
\left. u_{t+1}\right\vert Z_{t}\right] =0.$ From the bivariate nonparametric
regression in (\ref{jointregression}), we obtain the following marginal
regressions for $X_{t+1}$ and$\,Y_{t+1}:$%
\begin{equation}
X_{t+1}=\Phi _{1}\left( Z_{t}\right) +u_{t+1}^{X}
\label{unrestrictedregression}
\end{equation}%
and%
\begin{equation*}
Y_{t+1}=\Phi _{2}\left( Z_{t}\right) +u_{t+1}^{Y},
\end{equation*}%
where $\Phi _{1}\left( Z_{t}\right) =E\left[ \left. X_{t+1}\right\vert
X_{t},Y_{t}\right] $ and $\Phi _{2}\left( Z_{t}\right) =E\left[ \left.
Y_{t+1}\right\vert X_{t},Y_{t}\right] .$ In addition, we have%
\begin{equation*}
\sigma ^{2}[X_{t+1}\,|\,X_{t},Y_{t}]=Var\left[ u_{t+1}^{X}\right] =Var\left[
\left( X_{t+1}-\Phi _{1}\left( Z_{t}\right) \right) \right] .
\end{equation*}%
Similarly, we have%
\begin{equation*}
\sigma ^{2}[Y_{t+1}\,|\,X_{t},Y_{t}]=Var\left[ u_{t+1}^{Y}\right] =Var\left[
\left( Y_{t+1}-\Phi _{2}\left( Z_{t}\right) \right) \right] .
\end{equation*}

To quantify the degree of causality from $Y$ to $X$\ and from $X$ to $Y$ we
also need to consider the following constrained nonparametric regressions of 
$X$ and $Y$, respectively,%
\begin{equation}
X_{t+1}=\bar{\Phi}_{1}\left( X_{t}\right) +\bar{u}_{t+1}^{X}
\label{restrictedregression}
\end{equation}%
and%
\begin{equation*}
Y_{t+1}=\bar{\Phi}_{2}\left( Y_{t}\right) +\bar{u}_{t+1}^{Y},
\end{equation*}%
where $\bar{\Phi}_{1}\left( X_{t}\right) $ and $\bar{\Phi}_{2}\left(
Y_{t}\right) $ are unknown functions of $X_{t}$ and $Y_{t}$ such that $\bar{%
\Phi}_{1}\left( X_{t}\right) =E\left[ \left. X_{t+1}\right\vert X_{t}\right] 
$ and $\bar{\Phi}_{2}\left( Y_{t}\right) =E\left[ \left. Y_{t+1}\right\vert
Y_{t}\right] ,$ respectively, and $\bar{u}_{t+1}^{X}$and $\bar{u}_{t+1}^{Y}$
are error terms such that $E\left[ \left. \bar{u}_{t+1}^{X}\right\vert X_{t}%
\right] =0$ and $E\left[ \left. \bar{u}_{t+1}^{Y}\right\vert Y_{t}\right]
=0, $ respectively. We have%
\begin{equation*}
\bar{\sigma}^{2}[X_{t+1}\,|\,X_{t}]=Var\left[ \bar{u}_{t+1}^{X}\right] =Var%
\left[ \left( X_{t+1}-\bar{\Phi}_{1}\left( X_{t}\right) \right) \right] .
\end{equation*}%
Similarly, we have%
\begin{equation*}
\bar{\sigma}^{2}[Y_{t+1}\,|\,Y_{t}]=Var\left[ \bar{u}_{t+1}^{Y}\right] =Var%
\left[ \left( Y_{t+1}-\bar{\Phi}_{2}\left( Y_{t}\right) \right) \right] .
\end{equation*}

We can now immediately deduce the following result by using the definitions
of causality measures from $Y$ to $X$ and from $X$ to $Y$ [Definition \ref%
{Def: Mean-square causality measure relative to an information set}].

\begin{proposition}
\label{Feedback Causality Measures} (\emph{Measures of Nonlinear Granger
Causality in Mean}). Under assumption (\ref{jointregression}), the measure
of Granger causality in mean from $Y$ to $X$ is given by: 
\begin{equation}
C(\text{$Y\rightarrow X$}{|\,}I\text{{$\,$}})=\ln \left[ \frac{Var\left[
\left( X_{t+1}-\bar{\Phi}_{1}\left( X_{t}\right) \right) \right] }{Var\left[
\left( X_{t+1}-\Phi _{1}\left( Z_{t}\right) \right) \right] }\right] ,
\label{nonlinearmeasuresfromYtoX}
\end{equation}%
where $\bar{\Phi}_{1}\left( X_{t}\right) $ and $\Phi _{1}\left( Z_{t}\right) 
$ are the restricted and unrestricted nonparametric regression functions of $%
X_{t},$ respectively. Similarly, the measure of Granger causality in mean
from $X$ to $Y$ is given by:%
\begin{equation*}
C(X\text{$\rightarrow Y$}{|\,}I)=\ln \left[ \frac{Var\left[ \left( Y_{t+1}-%
\bar{\Phi}_{2}\left( Y_{t}\right) \right) \right] }{Var\left[ \left(
Y_{t+1}-\Phi _{2}\left( Z_{t}\right) \right) \right] }\right] ,
\end{equation*}%
where $\bar{\Phi}_{2}\left( Y_{t}\right) $ and $\Phi _{2}\left( Z_{t}\right) 
$ are the restricted and unrestricted nonparametric regression functions of $%
Y_{t},$ respectively.
\end{proposition}

Using Equation (\ref{eq: instantanouscausality}), a nonparametric
regression-based measure of the instantaneous causality between $X$ and $Y$
is given by the following proposition.

\begin{proposition}
\label{Instantaneous Causality Measures} (\emph{Measure of Instantaneous
Granger Causality in Mean}). Under assumption (\ref{jointregression}), the
measure of the instantaneous Granger causality in mean between $X$ and $Y$
is given by:%
\begin{equation}
C(X{-}Y{\,|\,}I)\text{$=${$\ln \left[ \frac{1}{1-\rho \lbrack \left(
X_{t+1}-\Phi _{1}\left( Z_{t}\right) \right) ,\,\left( Y_{t+1}-\Phi
_{2}\left( Z_{t}\right) \right) \,]^{2}}\right] ,$}}
\label{nonlinearinstantaneouscausality}
\end{equation}%
where $\Phi _{1}\left( Z_{t}\right) $ and $\Phi _{2}\left( Z_{t}\right) $
are the unrestricted nonparametric regression functions of $X_{t+1}$ and $%
Y_{t+1},$ respectively.
\end{proposition}

Finally, the nonparametric regression-based measure of dependence between $X$
and $Y$ can be deduced from its decomposition in (\ref{decomposition}).

In the next section, we propose nonparametric kernel estimators for the
previous Granger causality measures, and we derive their asymptotic
distributions. The basic idea is to consider a nonparametric estimation for
the restricted and unrestricted forecast errors: $X_{t+1}-\bar{\Phi}%
_{1}\left( X_{t}\right) ,$ $Y_{t+1}-\bar{\Phi}_{2}\left( Y_{t}\right) ,$ $%
X_{t+1}-\Phi _{1}\left( Z_{t}\right) ,$ and $Y_{t+1}-\Phi _{2}\left(
Z_{t}\right) $. The causality measures can be simply and consistently
estimated by replacing the unknown mean square forecast errors by their
nonparametric kernel estimates.

\section{Estimation and inference \label{Estimation and inference}}

\subsection{Estimation \label{sec: Consistent estimator}}

We have shown, see Section \ref{nonparametric measures}, that Granger
causality measures can be written in terms of variances of the restricted
and unrestricted forecast errors. Thus, these measures can be estimated by
replacing the unknown variances by their nonparametric estimates from a
finite sample. Hereafter, we focus on the estimation of Granger causality
measures from $Y$ to $X$, $C(Y\rightarrow X{|\,}I)$, which is defined in (%
\ref{nonlinearmeasuresfromYtoX}). We can similarly propose estimators for
the measures of Granger causality from $X$ to $Y$ and of the instantaneous
causality between $X$ and $Y$. For simplicity of exposition, we will omit
the conditioning set $I$ in the Granger causality measures defined in the
previous sections.

To consistently estimate $C(Y\rightarrow X)$, we need to provide consistent
estimates of the restricted and unrestricted mean square forecast errors $%
\bar{\sigma}^{2}\left[ X_{t+1}{\,|\,}X_{t}\right] $ and $\sigma
^{2}[X_{t+1}\,|\,X_{t},Y_{t}]$, respectively. The latter depend on the
restricted and unrestricted conditional regression functions $\bar{\Phi}%
_{1}(X_{t})$ and $\Phi _{1}(Z_{t}).$ Thus, $\bar{\sigma}^{2}\left[ X_{t+1}{%
\,|\,}X_{t}\right] $ and $\sigma ^{2}[X_{t+1}\,|\,X_{t},Y_{t}],$
consequently $C(Y\rightarrow X),$ can be consistently estimated using
nonparametric estimators of the functions $\bar{\Phi}_{1}(X_{t})$ and $\Phi
_{1}(Z_{t}).$ The well studied nonparametric estimators for the regression
functions are given by the Nadaraya-Watson kernel estimators; see Nadaraya
(1964) and Watson (1964). To this end, we define the weights 
\begin{equation}
W_{1,t+1}(x,\bar{h})=\frac{K\left( \frac{x-X_{t}}{\bar{h}}\right) }{%
\sum_{s=0}^{T-1}K\left( \frac{x-X_{s}}{\bar{h}}\right) }
\label{restrictedweights}
\end{equation}%
that we use to estimate the restricted conditional regression function $\bar{%
\Phi}_{1}(\cdot )=E(X_{t+1}|X_{t}=\cdot )$, where $\bar{h}=\bar{h}_{T}\in 
\mathbb{R}^{+}$ is a sequence of smoothing parameters (i.e. bandwidths) and $%
K$ is a univariate kernel function. We obtain the following Nadaraya-Watson
estimator of $\bar{\Phi}_{1}(\cdot )$%
\begin{equation*}
\hat{\bar{\Phi}}_{1}(x)=\sum_{t=0}^{T-1}W_{1,t+1}(x,\bar{h})X_{t+1},
\end{equation*}%
from which we can obtain the nonparametric residual-based estimator of the
restricted mean square forecast error 
\begin{equation}
\hat{\bar{\sigma}}^{2}\left[ X_{t+1}{\,|\,}X_{t}\right] :=\frac{1}{T}%
\sum_{t=0}^{T-1}(\hat{\bar{u}}_{t+1}^{X})^{2}=\frac{1}{T}%
\sum_{t=0}^{T-1}(X_{t+1}-\hat{\bar{\Phi}}_{1}(X_{t}))^{2}.
\label{restrictedvariance}
\end{equation}%
Similarly, for $z=(x,y)^{\prime }$ and a vector of smoothing parameters $%
h=(h_{1},h_{2})^{\prime }$, we define%
\begin{equation}
W_{2,t+1}(z,h)=\frac{K_{2}\left( \frac{z-Z_{t}}{h}\right) }{%
\sum_{s=0}^{T-1}K_{2}\left( \frac{z-Z_{s}}{h}\right) }
\label{unrestrictedweights}
\end{equation}%
as the Nadaraya-Watson weights that we will use to estimate the unrestricted
conditional regression function $\Phi _{1}(\cdot )=E(X_{t+1}|Z_{t}=\cdot )$,
where $K_{2}\left( \frac{z-Z_{t}}{h}\right) =K\left( \frac{x-X_{t}}{h_{1}}%
\right) K\left( \frac{y-Y_{t}}{h_{2}}\right) $ is a two-product kernel
function and $K$ is a univariate kernel function. Likewise, we have%
\begin{equation*}
\hat{\Phi}_{1}(z)=\sum_{t=0}^{T-1}W_{2,t+1}(z,h)X_{t+1}
\end{equation*}%
and 
\begin{equation}
\hat{\sigma}^{2}\left[ X_{t+1}{\,|\,}X_{t},Y_{t}\right] :=\frac{1}{T}%
\sum_{t=0}^{T-1}(\hat{u}_{t+1}^{X})^{2}=\frac{1}{T}\sum_{t=0}^{T-1}(X_{t+1}-%
\hat{\Phi}_{1}(Z_{t}))^{2}  \label{unrestrictedvariance}
\end{equation}%
as the Nadaraya-Watson estimator of $\Phi _{1}(\cdot )$ and nonparametric
residual-based estimator of $\sigma ^{2}[X_{t+1}\,|\,X_{t},Y_{t}]$,
respectively.

Notice that we have adopted three different bandwidths $\bar{h}$, $h_{1}$
and $h_{2}$ to take into account the possible data heterogeneity among $%
X_{t} $ and $Y_{t}$ in the nonparametric estimation of restricted and
unrestricted conditional regression functions and mean square forecast
errors. Furthermore, as is well known in the nonparametric estimation
literature, the choices of kernel functions are not important compared to
the choices of bandwidths. Therefore, broadly speaking, we could consider
the same univariate kernel function $K(\cdot )$ in the above kernel
estimators (Assumption\textbf{\ A.2.1}). To further simplify the notation
and our asymptotic analysis, in the unrestricted estimation outlined above,
we let $h_{1}=h_{2}=h$. However, different bandwidths could be considered
and, with little more complexity, the asymptotic theory developed in this
paper will still be valid when $h_{1}\neq h_{2}$.

Using the previous nonparametric estimators $\hat{\bar{\sigma}}^{2}\left[
X_{t+1}{\,|\,}X_{t}\right] $ and $\hat{\sigma}^{2}\left[ X_{t+1}{\,|\,}%
X_{t},Y_{t}\right] $, an estimator of measure of Granger causality in mean $%
C(Y\rightarrow X)$ is given by%
\begin{equation}
\hat{C}(Y\rightarrow X):=\ln \left( \frac{\hat{\bar{\sigma}}^{2}(X_{t+1}{%
\,|\,}X_{t})}{\hat{\sigma}^{2}(X_{t+1}{\,|\,}X_{t},Y_{t})}\right) =\ln
\left( \frac{\frac{1}{T}\sum_{t=0}^{T-1}(X_{t+1}-%
\sum_{s=0}^{T-1}W_{1,s+1}(X_{t},\bar{h})X_{s+1})^{2}}{\frac{1}{T}%
\sum_{t=0}^{T-1}(X_{t+1}-\sum_{s=0}^{T-1}W_{2,s+1}(Z_{t},h)X_{s+1})^{2}}%
\right) ,  \label{hatC}
\end{equation}%
where the weights $\bar{W}_{t+1}(x,\bar{h})$ and $W_{t+1}(z,h)$ are defined
in (\ref{restrictedweights}) and (\ref{unrestrictedweights}), respectively.
The most basic property that the above estimator should have is consistency.
To prove consistency, some regularity assumptions are needed. We consider a
set of standard assumptions on the stochastic processes, bandwidth
parameters, and kernel choices in the Nadaraya-Watson estimators.

\vspace{0.2cm}\noindent \textbf{Assumption A.1 on the stochastic process }

\begin{description}
\item[(A.1.1)] $\{Z_{t}=(X_{t},Y_{t})^{\prime }\in \mathbb{R}\times \mathbb{R%
}\equiv \mathbb{R}^{2},t\geq 0\}$ is a strictly stationary and ergodic
bivariate Markov process of order 1. Furthermore, $E|X_{t}|<\infty $ and $%
E|Y_{t}|<\infty $.

\item[(A.1.2)] The marginal density $f_{X}(x)$ of $X_{t}$ and the joint
density $f_{Z}(z)$ of $Z_{t}$ are bounded away from zero and bounded above.
\end{description}

\vspace{0.2cm}\noindent \textbf{Assumption A.2 on the bandwidth parameters
and kernel function}

\begin{description}
\item[(A.2.1)] The kernel functions $K(u)$ and $K_2(u,v)=K(u)K(v)$ are
univariate and two-product kernel functions, respectively. Specifically, the
univariate kernel $K(u)$ satisfies $K(-u)=K(u)$, $\int K(u)\,du=1$, $\int
uK(u)\,du=0$ and $\int u^{2}K(u)\,du<\infty $.

\item[(A.2.2)] The univariate bandwidth parameter $\bar{h}$ and the
bivariate bandwidth parameter $h$ satisfy $\bar{h}\rightarrow 0$, $%
h\rightarrow 0$ and $h^2=o(\bar{h})$ as $T\rightarrow \infty $. Further, $T%
\bar{h}\rightarrow \infty $ and $Th^{2}\rightarrow \infty $, as $%
T\rightarrow \infty $.
\end{description}

\noindent Assumption (\textbf{A.1.1)} is standard in asymptotic theory on
nonparametric regression for dependent data. It is satisfied by many
processes such as ARMA and ARCH processes. This assumption implies that $%
\bar{u}_{t}^{X}$ and $u_{t}^{X}$ are strictly stationary and ergodic.
Observe that Assumption (\textbf{A.1.2), }which requires that the densities $%
f_{X}(x)$ and $f_{Z}(z)$ have to be bounded away from zero, is for
convenient purposes only. This assumption eases greatly the derivation of
the asymptotic theory. It can be weakened by employing, for example,
indicator function as a trimming function like in Robinson (1988) to trim
out near zero densities in the nonparametric estimation procedure. We can
also use a general weighting function (like densities) to circumvent the
problem of random denominator often encountered in the nonparametric
estimation and testing literature. We need Assumptions (\textbf{A.2.1)} and (%
\textbf{A.2.2)} to show the asymptotic normality of nonparametric
estimators. In particular, Assumption (\textbf{A.2.1)} is needed to
alleviate the bias terms in the nonparametric estimators of variances
constructed from the restricted and unrestricted nonparametric residuals.
Assumption (\textbf{A.2.2)} is a common and minimal assumption in the
nonparametric regression literature.

We now state the consistency of the nonparametric estimator $\hat{C}%
(Y\rightarrow X)$ in (\ref{hatC}).

\begin{proposition}
\label{consistency of the estimator} Under Assumptions (\textbf{%
A.1.1)-(A.2.2)}, the estimator $\hat{C}(Y\rightarrow X)$ in (\ref{hatC})
converges in probability to the true Granger causality measure $%
C(Y\rightarrow X)$.
\end{proposition}

In the next section we establish the asymptotic normality of $\hat{C}%
(Y\rightarrow X)$ in (\ref{hatC}). This will enable us to build tests and
confidence intervals for the proposed Granger causality measures.

\subsection{Inference \label{sec: Hypothesis testing}}

\subsubsection{Asymptotic distribution}

The causality measures defined in the previous sections can also be used to
test for Granger non-causality in mean between $X$ and $Y$. If there is no
causality from $Y$ to $X$, then the restricted and unrestricted mean square
forecast errors of $X$ will be equal: $\bar{\sigma}^{2}\left[ X_{t+1}{\,|\,}%
X_{t}\right] =\sigma ^{2}[X_{t+1}\,|\,X_{t},Y_{t}]=\sigma ^{2}$. Hereafter,
we wish to test the null hypothesis 
\begin{equation}
H_{0}:C(Y\rightarrow X)=0.  \label{nullhypothesis}
\end{equation}%
Again, we focus on Granger causality from $Y$ to $X$, but similar results
can be obtained for Granger causality from $X$ to $Y$ and instantaneous
causality between $X$ and $Y$. We now derive the asymptotic normality of
nonparametric estimator defined in Equation (\ref{hatC}), and we establish
the consistency of the test statistic (hereafter $\hat{\Gamma}_{T}$) which
will be used to test $H_{0}$.

The following theorem provides the asymptotic normality of nonparametric
estimator of our Granger causality measure.

\begin{theorem}
\label{Theorem I} Suppose Assumptions (\textbf{A.1.1)-(A.2.2)} are
satisfied. Then under $H_{0}$, we have 
\begin{equation*}
Th\hat{C}(Y\rightarrow X)\xrightarrow{d}\mathcal{N}(0,\Omega ),
\end{equation*}%
where 
\begin{equation*}
\Omega =\frac{2}{\sigma ^{4}}E\frac{\sigma ^{4}(Z_{t})}{f_{Z}(Z_{t})}\int
(2K(u)-\overline{K}(u))^{2}\,du,
\end{equation*}%
with $\overline{K}(u)=\int K(v)K(u+v)\,dv$ is the convolution of kernels.
\end{theorem}

The variance $\Omega $ in Theorem \ref{Theorem I} can be consistently
estimated as follows: 
\begin{equation}
\hat{\Omega}=\frac{2}{(\frac{1}{T}\sum_{t=0}^{T-1}\hat{\bar{u}}%
_{t+1}^{X2})^{2}}\frac{1}{T(T-1)}\sum_{t=0}^{T-1}\sum_{s=0,s\neq
t}^{T-1}K_{2}\left( \frac{Z_{t}-Z_{s}}{h}\right) \frac{\hat{\bar{u}}%
_{t+1}^{X2}\hat{\bar{u}}_{s+1}^{X2}}{h^{2}\hat{f}_{Z}^{2}(Z_{t})}\int (2K(u)-%
\overline{K}(u))^{2}\,du,  \label{variance estimation}
\end{equation}%
where $\hat{\bar{u}}_{t+1}^{X}=X_{t+1}-\hat{\bar{\Phi}}_{1}(X_{t})$ denotes
the nonparametric residuals obtained from the restricted nonparametric
regression and $\hat{f}_{Z}(Z_{t})=\frac{1}{(T-1)h^{2}}\sum_{s=0,s\neq
t}^{T-1}K_{2}\left( \frac{Z_{t}-Z_{s}}{h}\right) $ is the leave-one-out
Nadaraya-Watson estimator of density $f_{Z}(Z_{t})$.

We now define the following test statistic 
\begin{equation*}
\hat{\Gamma}_{T}=\frac{Th\hat{C}(Y\rightarrow X)}{\sqrt{\hat{\Omega}}}.
\end{equation*}%
Theorem \ref{Theorem I} implies that under $H_{0},$ the test statistic $\hat{%
\Gamma}_{T}$ is asymptotically distributed as $N(0,1).$ This forms the basis
for the following one-sided asymptotic test for $H_{0}$: for a given
significance level $\alpha $, we reject $H_{0}$ if $\hat{\Gamma}%
_{T}>z_{\alpha }$, where $z_{\alpha }$ is the upper $\alpha $-percentile of
the standard normal distribution.

The following proposition establishes the consistency of the above test.

\begin{proposition}
\label{consistency of the test statistic}Under Assumptions (\textbf{%
A.1.1)-(A.2.2)}, the test defined by the statistic $\hat{\Gamma}_{T}$ and
Theorem \ref{Theorem I} is consistent for any loss functions $\bar{\sigma}%
^{2}\left[ X_{t+1}{\,|\,}X_{t}\right] $ and $\sigma
^{2}[X_{t+1}\,|\,X_{t},Y_{t}]$ such that: 
\begin{equation*}
\bar{\sigma}^{2}\left[ X_{t+1}{\,|\,}X_{t}\right] -\sigma
^{2}[X_{t+1}\,|\,X_{t},Y_{t}]>0,
\end{equation*}%
where $\sigma ^{2}[X_{t+1}\,|\,X_{t},Y_{t}]$ and $\bar{\sigma}^{2}\left[
X_{t+1}{\,|\,}X_{t}\right] $\ are the mean square forecast errors from the
unrestricted and restricted nonparametric regressions in (\ref%
{unrestrictedregression}) and (\ref{restrictedregression}), respectively.
\end{proposition}

We now examine the asymptotic local power property of the above test. Define
the sequence of local alternatives 
\begin{equation}
H_{1T}:C(Y\rightarrow X)=\frac{1}{Th}\mu ,  \label{localalternatives}
\end{equation}%
where $\mu $ is a finite positive constant, indicating the deviation of $%
C(Y\rightarrow X)$ (degree of causality in mean from $Y$ to $X$) from zero.
The following proposition states that our test has non-trivial asymptotic
power against local alternatives converging to the null $H_{0}$ at the rate
of $(Th)^{-1}$.

\begin{proposition}
\label{power}Under Assumptions (\textbf{A.1.1)-(A.2.2)} and $H_{1T}$, we
have 
\begin{equation*}
\hat{\Gamma}_{T}\xrightarrow{d}\mathcal{N}(\mu ,1).
\end{equation*}
\end{proposition}

\noindent We do not provide the proof of Proposition \ref{power} since it is
obvious from the proof of Proposition \ref{consistency of the test statistic}%
. We can immediately conclude that the limiting distribution of
nonparametric estimator $\hat{C}(Y\rightarrow X)$ is non-trivially shifted
whenever $\mu >0,$ and therefore the proposed test is able to detect local
alternatives that converge to the null $H_{0}$ at the rate of $(Th)^{-1}$.
The local power of the test increases with the deviation of $\mu $, and thus
our test has non-trivial power against the local alternatives in (\ref%
{localalternatives}), which are arbitrarily close to the parametric rate $%
T^{-1/2}$ by taking a large bandwidth $h$.

\subsubsection{Smoothed local bootstrap \label{local bootstrap}}

The result in Theorem \ref{Theorem I} is valid only asymptotically, and the
asymptotic normal distribution might not work well in the finite samples.
Particularly, for high dimensional random variables the asymptotic test is
subject to size distortion because of possible finite sample bias in the
nonparametric estimation due to curse of dimensionality. One way to improve
the size performance of the asymptotic test is to use the smoothed local
bootstrap introduced in Paparoditis and Politis (2000). One major advantage
of smoothed local bootstrap procedure is it can preserve the unknown
dependence structure in the data, thus it can \textquotedblleft
mimic\textquotedblright\ the finite sample distribution of our test
statistic.

In the sequel, $X\sim f_{X}$ means that the random variable $X$ is generated
from a density function $f_{X}$. Let $L_{1}(\cdot )$, $L_{2}(\cdot )$ $%
L_{3}(\cdot )$ be three univariate kernels that satisfy Assumption (\textbf{%
A.2.1)} and $h^{\ast }$ be a smoothing parameter satisfying Assumption 
\textbf{A.3} below. Hereafter, we discuss the implementation of local
smoothed bootstrap. The method is easy to implement in the following four
steps:\newline
\noindent \textbf{(1)} We draw a bootstrap sample $\{(X_{t}^{\ast
},Y_{t}^{\ast })\}_{t=1}^{T}$. We first draw $X_{t-1}^{\ast }$ using the
nonparametric kernel density of $X$%
\begin{equation*}
X_{t-1}^{\ast }\sim \frac{1}{Th^{\ast }}\sum_{s=1}^{T}L_{1}\left( \frac{%
X_{s-1}-x}{h^{\ast }}\right) ;
\end{equation*}%
then conditional on $X_{t-1}^{\ast }$, we draw $X_{t}^{\ast }$ and $%
Y_{t-1}^{\ast }$ independently from the following nonparametric conditional
densities%
\begin{equation*}
X_{t}^{\ast }\sim \frac{1}{h^{\ast }}\sum_{s=1}^{T}L_{1}\left( \frac{%
X_{s-1}-X_{t-1}^{\ast }}{h^{\ast }}\right) L_{2}\left( \frac{X_{s}-y}{%
h^{\ast }}\right) /\sum_{s=1}^{T}L_{1}\left( \frac{X_{s-1}-X_{t-1}^{\ast }}{%
h^{\ast }}\right)
\end{equation*}%
and 
\begin{equation*}
Y_{t-1}^{\ast }\sim \frac{1}{h^{\ast }}\sum_{s=1}^{T}L_{1}\left( \frac{%
X_{s-1}-X_{t-1}^{\ast }}{h^{\ast }}\right) L_{3}\left( \frac{Y_{s-1}-z}{%
h^{\ast }}\right) /\sum_{s=1}^{T}L_{1}\left( \frac{X_{s-1}-X_{t-1}^{\ast }}{%
h^{\ast }}\right) ;
\end{equation*}

\noindent \textbf{(2)} Based on the bootstrap sample, we compute the
bootstrapped version of the test statistic: $\hat{\Gamma}_{T}^{\ast }=Th 
\hat{C}^{\ast }(Y\rightarrow X)/\sqrt{\hat{\Omega}^{\ast }}$;

\noindent \textbf{(3)} Repeat the steps (1)-(2) $B$ times so that we get $%
\hat{\Gamma}_{j,T}^{\ast }$, for $j=1,\ldots ,B$;

\noindent \textbf{(4)} We compute the bootstrapped $p$\emph{-value} using $%
p^{\ast }=B^{-1}\sum_{j=1}^{B}1(\hat{\Gamma}_{j,T}^{\ast }>\hat{\Gamma}%
_{T}), $ where $\hat{\Gamma}_{T}=Th\hat{C}(Y\rightarrow X)/\sqrt{\hat{\Omega}%
}$ is the test statistic based on the original sample, and for a given
significance level $\alpha $, we reject the null hypothesis if $p^{\ast
}<\alpha $.

Notice that in the above bootstrap procedure, we have taken the same
bandwidth $h^{\ast }$ in the nonparametric kernel estimators of the marginal
density of $X_{t-1}$ and the conditional densities of $X_{t}$ and $Y_{t-1}$.
However, using different bandwidth parameters will not invalidate the local
bootstrap. In order to validate the above smoothed local bootstrap, we need
to impose an additional assumption concerning the bandwidth parameter $%
h^{\ast }$.

\vspace{0.2cm}\noindent \textbf{Assumption A.3 on the bootstrap bandwidth
parameter: }The bootstrap bandwidth parameter $h^{\ast }$ satisfies $h^{\ast
}\rightarrow 0$ and $Th^{\ast 5}/(\ln T)^{\gamma }\rightarrow C$, for some $%
\gamma >0$ and $0<C<\infty $, as $T\rightarrow \infty $.

\begin{theorem}
\label{bootstrap} Suppose Assumptions (\textbf{A.1.1)-(A.2.2)} and \textbf{%
A.3 }are satisfied. Then under $H_{0}$, we have 
\begin{equation*}
\hat{\Gamma}_{T}^{\ast }:=\frac{Th^{\ast }\hat{C}^{\ast }(Y\rightarrow X)}{%
\sqrt{\Omega }}\xrightarrow{d}\mathcal{N}(0,1),
\end{equation*}%
where $\Omega $ is defined in Theorem \ref{Theorem I}.
\end{theorem}

\section{Measuring causality between high dimensional variables \label{sec:
Extension}}

Due to the prevalent curse of dimensionality, it has been well established
that the convergence rate of nonparametric estimator of regression function
is slow and decreasing with the dimension of the covariates. This result is
also generally true for the estimation of the variance in the context of
nonparametric regression. More details on the estimation of variance in the
presence of high-dimensional covariates can be found in Spokoiny (2002). In
this section, we extend our previous analysis to high dimensional variables.

We consider the following set of standard assumptions. They are only mild
modification of Assumptions\textbf{\ (A.1.1)-(A.2.2)}.

\vspace{0.2cm}\noindent \textbf{Assumption A.1$^{\mathbf{\prime }}$ on the
stochastic process}

\begin{description}
\item[(A.1.1$^{\prime }$)] $\{Z_{t}=(X_{t}^{\prime },Y_{t}^{\prime
})^{\prime }\in \mathbb{R}^{d_{1}p}\times \mathbb{R}^{d_{2}p}\equiv \mathbb{R%
}^{d},$ $t\geq 0\}$ is a strictly stationary, ergodic vector Markov process
of order $p$.

\item[(A.1.2$^{\prime }$)] The marginal density $f_{X}(x)$ of $X_{t}$ and
joint density $f_{Z}(z)$ of $Z_{t}$ are bounded away from zero and bounded
above. We also assume that both $f_{X}(x)$ and $f_{Z}(z)$ are $r+1$-times
continuously differentiable on their supports $\mathcal{X}$ and $\mathcal{Z}$%
, respectively.
\end{description}

\vspace{0.2cm}\noindent \textbf{Assumption A.2$^{\mathbf{\prime }}$ on the
bandwidth parameters and kernel function }

\begin{description}
\item[(A.2.1$^{\prime }$)] The kernel functions $K_{d_{1}p}(\cdot )$ and $%
K_{dp}(\cdot )$ are $d_{1}p$-product and $dp$-product kernel functions,
respectively and they are symmetric and bounded. That is, $K_{d_{1}p}(u)=%
\underset{j=1}{\overset{d_{1}p}{\Pi }}K(u_{j})$ and $K_{dp}(u)=\underset{j=1}%
{\overset{dp}{\Pi }}K(u_{j})$, where $K(u)$ is a univariate kernel that
satisfies $\int K(u)\,du=1$ and $\int u^{i}K(u)\,du=0$ for $1\leq i\leq r-1$
and $\int u^{r}K(u)\,du<\infty $ with $r\geq 2$.

\item[(A.2.2$^{\prime }$)] The bandwidth parameters $\bar{h}$ and $h$
satisfy $\bar{h}\rightarrow 0$, $h\rightarrow 0$ and $h^{d_{1}+d_{2}}=o(\bar{%
h}^{d_{1}})$ as $T\rightarrow \infty $. Further, $T\bar{h}%
^{d_{1}p}\rightarrow \infty $, $Th^{(d_{1}+d_{2})p}\rightarrow \infty $, as $%
T\rightarrow \infty $.
\end{description}

\noindent As we saw in the previous sections, for univariate and first order
Markov (i.e. $d_{1}=d_{2}=1$ and $p=1$) processes, a standard Gaussian
kernel function ($r=2$) suffices. However, for high dimensional and high
order Markov processes, a higher order kernel is needed. In the following
proposition we state the consistency of nonparametric estimator of Granger
causality measure $C\left( Y\rightarrow X\right) .$

\begin{proposition}
\label{consistency of the estimator2} Under Assumptions \textbf{($\text{A.1.1%
}$}$^{\prime }$\textbf{)-($\text{A.2.2}$}$^{\prime }$\textbf{)}, the
nonparametric estimator $\hat{C}(Y\rightarrow X)$ of measure of Granger
causality from $Y$ to $X$ converges in probability to the true Granger
causality measure $C(Y\rightarrow X)$.
\end{proposition}

We now derive the asymptotic normality of $\hat{C}(Y\rightarrow X)$ under
the null $H_{0}$ in (\ref{nullhypothesis}).

\begin{theorem}
\label{asymptotics2} Under Assumptions \textbf{($\text{A.1.1}$}$^{\prime }$%
\textbf{)-($\text{A.2.2}$}$^{\prime }$\textbf{)} and $H_{0}$, we have 
\begin{equation*}
Th^{\frac{(d_{1}+d_{2})p}{2}}\hat{C}(Y\rightarrow X)\xrightarrow{d}\mathcal{N%
}(0,\Omega ),
\end{equation*}%
where 
\begin{equation*}
\Omega =\frac{2}{\sigma ^{4}}E\frac{\sigma ^{4}(Z_{t})}{f_{Z}(Z_{t})}\int
(2K_{d_{1}p}(u)-\overline{K}(u))^{2}\,du,
\end{equation*}%
with $\overline{K}(u)=\int K_{d_{1}p}(v)K_{d_{1}p}(u+v)\,dv$ is the
convolution of kernels.
\end{theorem}

\noindent A consistent estimator of\ the variance $\Omega $\ in Theorem 3
can be obtained using a similar formula as the one in Equation (\ref%
{variance estimation}). Furthermore, note that the proofs of Proposition \ref%
{consistency of the estimator2} and Theorem \ref{asymptotics2} are similar
to those of Proposition \ref{consistency of the estimator} and Theorem \ref%
{Theorem I}, respectively, hence we omit them. However, it is important to
mention that because of the curse of dimensionality that affects the
nonparametric estimation of conditional regression functions, for small
samples we suggest to use the bootstrap-assisted test, see Section \ref%
{local bootstrap}, to alleviate or eliminate the bias term in the test
statistic.

\section{Monte Carlo simulations \label{sec: Monte-Carlo simulations}}

In this section, we conduct a Monte Carlo simulation study to investigate
the performance of the bootstrap-based test that we proposed previously. Our
primary interest is to evaluate the empirical size and power of the test in
Theorem \ref{bootstrap}. We will also compare with size and power of
Nishiyama et al.'s (2011) nonparametric test for testing the Granger
non-causality in mean.

Throughout this section, we consider two univariate time series processes $%
X_{t}$ and $Y_{t}$. The null hypothesis of interest corresponds to Granger
non-causality in mean from $Y$ to $X,$ i.e. $H_{0}:C(Y\rightarrow X)=0$. In
the sequel, $\eta _{t}$ and $\varepsilon _{t}$ are two independent sequences
of independently and identically distributed (i.i.d.) standard normal random
variables.

\subsection{Bootstrap-based test \label{Bootstrap-based test}}

Though the asymptotic-based test is not time consuming and easy to
implement, in small samples the size of the test statistic $\hat{\Gamma}_{T}$
may differ significantly from the significance level. The size distortion is
almost unavoidable for small samples. However, it is also known that some
types of bootstrap such as smoothed local bootstrap or moving block
bootstrap can help to eliminate or mitigate the asymptotically negligible
higher order terms that may have substantial adverse effect on the size of $%
\hat{\Gamma}_{T}$. Additional benefits of using smoothed local
bootstrap-based test are: (i) it can handle an unknown form of dependence in
the data and (ii) it is not very sensitive to changes in the bandwidth
parameter $\delta $.

In this section, we investigate the performance of nonparametric test
statistic $\hat{\Gamma}_{T}^{\ast }$ in Theorem \ref{bootstrap} using the
local smoothed bootstrap of Paparoditis and Politis (2000). In particular,
we examine its size and power properties using the data generating processes
(DGPs) presented in Table \ref{tab:biasbootsimul}. Last column of Table \ref%
{tab:biasbootsimul} summarizes different directions of causality and
non-causality in those DGPs. The first four DGPs (DGP S1 to DGP S4) of $Y$
and $X$ are used to investigate the size property, since in those DGPs the
null hypothesis is satisfied. However, in DGP P1 to DGP P5 of $X$ the null
hypothesis is not satisfied, and therefore those GDPs serve to illustrate
the power of our test. Furthermore, notice that DGP S1 and DGP P1 correspond
to linear processes, while the other DGPs are highly nonlinear. All DGPs
under consideration are strictly stationary and ergodic.

%TCIMACRO{\TeXButton{\begin{table}}{\begin{table}}}%
%BeginExpansion
\begin{table}%
%EndExpansion
\caption{Data-generating processes}\label{tab:biasbootsimul} 
%Table \thetable. Impact of volatility  (EGARCH-T with and without constant) of money supply growth rate on Mean of stock market return%
%TCIMACRO{\TeXButton{\small}{\small}}%
%BeginExpansion
\small%
%EndExpansion
\begin{equation*}
\begin{tabular}{lccc}
\hline\hline
DGPs & \multicolumn{2}{c}{$\text{Variables of Interest}$} & Direction of
Causality \\ \hline
& $Y_{t}$ & $X_{t}$ & \multicolumn{1}{l}{} \\ \cline{1-3}
DGP S1 & $Y_{t}=0.5Y_{t-1}+\varepsilon _{t}$ & $X_{t}=0.5X_{t-1}+\eta _{t}$
& $X\nrightarrow Y,$ $Y\nrightarrow X$ \\ 
DGP S2 & $Y_{t}=0.5Y_{t-1}+\varepsilon _{t}$ & $X_{t}=|X_{t-1}|^{0.8}+\eta
_{t}$ & $X\nrightarrow Y,$ $Y\nrightarrow X$ \\ 
DGP S3 & $Y_{t}=0.5Y_{t-1}+\varepsilon _{t}$ & $X_{t}=0.5X_{t-1}\exp
\{-0.5X_{t-1}^{2}\}+\eta _{t}$ & $X\nrightarrow Y,$ $Y\nrightarrow X$ \\ 
DGP S4 & $Y_{t}=0.5Y_{t-1}+\varepsilon _{t}$ & $X_{t}=\sin (X_{t-1})+\eta
_{t}$ & $X\nrightarrow Y,$ $Y\nrightarrow X$ \\ 
DGP P1 & $Y_{t}=0.5Y_{t-1}+\varepsilon _{t}$ & $X_{t}=0.5X_{t-1}+0.5Y_{t-1}+%
\eta _{t}$ & $X\nrightarrow Y,$ $Y\rightarrow X$ \\ 
DGP P2 & $Y_{t}=0.5Y_{t-1}+\varepsilon _{t}$ & $%
X_{t}=0.5X_{t-1}+0.5Y_{t-1}+0.5\sin (-2Y_{t-1})+\eta _{t}$ & $X\nrightarrow
Y,$ $Y\rightarrow X$ \\ 
DGP P3 & $Y_{t}=0.5Y_{t-1}+\varepsilon _{t}$ & $%
X_{t}=0.5X_{t-1}+0.5Y_{t-1}^{2}+\eta _{t}$ & $X\nrightarrow Y,$ $%
Y\rightarrow X$ \\ 
DGP P4 & $Y_{t}=0.5Y_{t-1}+\varepsilon _{t}$ & $X_{t}=0.5X_{t-1}Y_{t-1}+\eta
_{t}$ & $X\nrightarrow Y,$ $Y\rightarrow X$ \\ 
DGP P5 & $Y_{t}=0.5Y_{t-1}+\varepsilon _{t}$ & $X_{t}=\sin
(2(X_{t-1}+Y_{t-1}))+\eta _{t}$ & $X\nrightarrow Y,$ $Y\rightarrow X$ \\ 
\hline\hline
\end{tabular}%
\end{equation*}

\noindent \textbf{Note}$\text{: }${\small This table summarizes the data
generating processes that we consider in the simulation study to investigate
the properties (size and power) of nonparametric test of Granger causality
measures. We simulate (}$Y_{t},X_{t}${\small ), for }$t=1,\ldots ,T,${\small %
\ under the assumption that }$(\varepsilon _{t},\eta _{t})^{\prime }$ 
{\small are i.i.d. from }$N(0,I_{2})${\small . The last column of the table
summarizes the directions of causality and non-causality in each DGP.
\textquotedblleft }$\rightarrow ${\small \textquotedblright\ and
\textquotedblleft }$\nrightarrow ${\small \textquotedblright\ refer to
Granger causality and non-causality, respectively.}

%TCIMACRO{\TeXButton{\end{table}}{\end{table}}}%
%BeginExpansion
\end{table}%
%EndExpansion

The local bootstrap-based test depends on the bandwidth parameters $\bar{h}$%
, $h,$ and $h^{\ast }$. In our simulations, we adopt two different
bandwidths. For the restricted regression model we use a univariate
bandwidth $\bar{h}=T^{-1/(2+\delta )}$, and for the unrestricted regression
model we use a bivariate bandwidth $(h_{1},h_{2})^{\prime }$, with $%
h_{1}=h_{2}=h=T^{-1/5}$. To meet the Assumption \textbf{(A.2.2)}, $\delta
>0.5$ suffices. We have experimented various $\delta $'s ranging from $0.6$
to $1$ and the choice of $\delta =0.6$ or $0.8$ seems to produce the best
overall results. For simplicity, the bandwidth $h^{\ast }$ takes the same
values as the above univariate bandwidth $\bar{h}.$ How to optimally choose
the bandwidths $\bar{h}$ and $h$ in order to maximize our test's performance
is not yet investigated and calls for more attention in the future work. At
least three different ways can be used to choose the bandwidth in practice.
The first one is the cross-validation bandwidth proposed by Li et al.
(2013). However, strictly speaking, since the cross-validated bandwidth is
random, the asymptotic theory can be justified only through certain
stochastic equicontinuity argument. The cross-validation technique is used
in Li et al. (2009) for testing the equality of two unconditional and
conditional functions in the context of mixed categorical and continuous
data. This approach, which is optimal for the estimation, loses the
optimality for nonparametric kernel testing. The second way is given by an
adaptive-rate-optimal rule proposed by\ Horowitz and Spokoiny (2001) for
testing a parametric model for conditional mean function against a
nonparametric alternative. The third way for selecting a practical bandwidth
is introduced by Gao and Gijbels (2008). The latter propose, using the
Edgeworth expansion of the asymptotic distribution of the test, to choose
the bandwidth such that the power function of the test is maximized while
the size function is controlled. Finally, to estimate the conditional
restricted and unrestricted regression functions, we take the univariate
kernel function $K(\cdot )$ equal to the standard normal density.

Three sample sizes $T=50,$ $75$ and $200$ are considered. For each DGP, we
first generate $T+200$ observations and then discard the first $200$
observations to minimize the effect of the initial values. Other sample
sizes ($T=100,$ $300,$ $400,$ $500,$ and $1000$) for different DGPs are
considered in Section \ref{Comparison with Nishiyama}. We use $1000$
simulations to compute the empirical size and power. For each simulation we
use $B=199$ bootstrap replications. Finally, we focus on the nominal size $%
5\%.$

%TCIMACRO{\TeXButton{\begin{table}}{\begin{table}}}%
%BeginExpansion
\begin{table}%
%EndExpansion
\caption{Empirical size of local bootstrap-based test}\label{tb:
empiricalsizebootstrap} 
%Table \thetable. Impact of volatility  (EGARCH-T with and without constant) of money supply growth rate on Mean of stock market return%
%TCIMACRO{\TeXButton{\small}{\small}}%
%BeginExpansion
\small%
%EndExpansion
\begin{equation*}
\begin{tabular}{@{}ccccc}
\hline\hline
Bandwidth Parameter & \multicolumn{4}{c}{DGPs} \\ \hline
\multicolumn{1}{r}{$\bar{h}=T^{-1/(2+\delta )},$ $h=T^{-1/5}$} & DGP S1 & 
DGP S2 & DGP S3 & DGP S4 \\ 
\multicolumn{5}{c}{$\mathbf{T=50}$} \\ 
\multicolumn{1}{l}{$\delta =0.6$} & 0.046 & 0.048 & 0.064 & 0.048 \\ 
\multicolumn{1}{l}{$\delta =0.8$} & 0.048 & 0.052 & 0.062 & 0.050 \\ 
\multicolumn{5}{c}{$\mathbf{T=75}$} \\ 
\multicolumn{1}{l}{$\delta =0.6$} & 0.048 & 0.052 & 0.060 & 0.038 \\ 
\multicolumn{1}{l}{$\delta =0.8$} & 0.052 & 0.053 & 0.064 & 0.032 \\ 
\multicolumn{5}{c}{$\mathbf{T=200}$} \\ 
\multicolumn{1}{l}{$\delta =0.6$} & 0.052 & 0.048 & 0.055 & 0.045 \\ 
\multicolumn{1}{l}{$\delta =0.8$} & 0.050 & 0.046 & 0.054 & 0.046 \\ 
\hline\hline
\end{tabular}%
\end{equation*}%
\noindent \textbf{Note}$\text{: }${\small This table reports the empirical
size of local bootrsap-based test in Theorem \ref{bootstrap} for testing the
non-causality in mean from }${\small Y}${\small \ to }${\small X}${\small \
at }${\small \alpha =5\%}${\small \ significance level. The number of
simulations is equal to }${\small 1000}${\small \ and the number of
bootstrap resamples is }${\small B=199}${\small .}

%TCIMACRO{\TeXButton{\end{table}}{\end{table}}}%
%BeginExpansion
\end{table}%
%EndExpansion

%TCIMACRO{\TeXButton{\begin{table}}{\begin{table}}}%
%BeginExpansion
\begin{table}%
%EndExpansion
\caption{Empirical power of local bootstrap-based test}\label{tb:
empiricalpowerbootstrap} 
%Table \thetable. Impact of volatility  (EGARCH-T with and without constant) of money supply growth rate on Mean of stock market return%
%TCIMACRO{\TeXButton{\small}{\small}}%
%BeginExpansion
\small%
%EndExpansion

\begin{equation*}
\begin{tabular}{@{}cccccc}
\hline\hline
Bandwidth Parameter & \multicolumn{5}{c}{DGPs} \\ \hline
\multicolumn{1}{r}{$\bar{h}=T^{-1/(2+\delta )},$ $h=T^{-1/5}$} & DGP P1 & 
DGP P2 & DGP P3 & DGP P4 & DGP P5 \\ 
\multicolumn{6}{c}{$\mathbf{T=50}$} \\ 
\multicolumn{1}{l}{$\delta =0.6$} & 0.232 & 0.210 & 0.398 & 0.254 & 0.284 \\ 
\multicolumn{1}{l}{$\delta =0.8$} & 0.234 & 0.212 & 0.390 & 0.242 & 0.292 \\ 
\multicolumn{6}{c}{$\mathbf{T=75}$} \\ 
\multicolumn{1}{l}{$\delta =0.6$} & 0.394 & 0.326 & 0.700 & 0.494 & 0.488 \\ 
\multicolumn{1}{l}{$\delta =0.8$} & 0.406 & 0.400 & 0.624 & 0.504 & 0.494 \\ 
\multicolumn{6}{c}{$\mathbf{T=200}$} \\ 
\multicolumn{1}{l}{$\delta =0.6$} & 0.630 & 0.752 & 0.982 & 0.870 & 0.852 \\ 
\multicolumn{1}{l}{$\delta =0.8$} & 0.664 & 0.776 & 0.950 & 0.882 & 0.844 \\ 
\hline\hline
\end{tabular}%
\end{equation*}%
\noindent \textbf{Note}$\text{: }${\small This table reports the empirical
power of local bootrsap-based test in Theorem \ref{bootstrap} for testing
the non-causality in mean from }${\small Y}${\small \ to }${\small X}$%
{\small \ at }${\small \alpha =5\%}${\small \ significance level. The number
of simulations is equal to }${\small 1000}${\small \ and the number of
bootstrap resamples is }${\small B=199}${\small .}

%TCIMACRO{\TeXButton{\end{table}}{\end{table}}}%
%BeginExpansion
\end{table}%
%EndExpansion

Tables \ref{tb: empiricalsizebootstrap} and \ref{tb: empiricalpowerbootstrap}
report the empirical size and power of the test statistic $\Gamma _{T}^{\ast
}$ in Theorem \ref{bootstrap}, respectively. As expected, the local
bootstrap-based test performs well, in terms of size, in small samples as
small as $T=50$. This test also has reasonable power against various
alternatives. Thus, given the small and moderate samples under
consideration, the performance of local bootstrap-based test is satisfactory.

\subsection{Comparison with Nishiyama et al.'s (2011) test \label{Comparison
with Nishiyama}}

In Section \ref{sec: Hypothesis testing} we saw that testing that the
causality measure is equal to zero is equivalent to testing for Granger
non-causality in mean. Thus, the tests in Theorems \ref{Theorem I} and \ref%
{bootstrap} can be viewed as tests of Granger non-causality in mean.
Nishiyama et al. (2011) have recently proposed a nonparametric test for
testing nonlinear Granger causality in mean. Under the null hypothesis of
non-causality in mean, the asymptotic distribution of Nishiyama et al.'s
(2011) test statistic is not normal, but its critical regions can be
computed using simulation.

In this section, we consider an additional simulation exercise to compare
the empirical size and power of our bootstrap-based test with those of
Nishiyama et al.'s (2011) nonparametric test. We use the same simulation
settings as in Nishiyama et al. (2011) and consider their DGPs that we
report in Table 1 of the Technical Appendix, which is published online.
Since $\delta =0.6$ and $\delta =0.8$ lead to quite similar results in terms
of size and power, see Section \ref{Bootstrap-based test}, in this section
we focus on $\delta =0.8.$ We also use the following bandwidths: univariate
bandwidth $\bar{h}=T^{-1/(2.8)}$ and bivariate bandwidth $%
h_{1}=h_{2}=h=T^{-1/5}$. To facilitate the comparison between the two tests,
sample sizes $T=100,$ $200,$ $300,$ $400,$ $500,$ and $1000$ are considered.

%TCIMACRO{\TeXButton{\begin{table}}{\begin{table}}}%
%BeginExpansion
\begin{table}%
%EndExpansion
\caption{Empirical size and power of our local bootstrap-based test and Nishiyama et al.
(2011)'s test}\label{tb: empiricalpowerbootstrapNishiyama} 
%Table \thetable. Impact of volatility  (EGARCH-T with and without constant) of money supply growth rate on Mean of stock market return%
%TCIMACRO{\TeXButton{\small}{\small}}%
%BeginExpansion
\small%
%EndExpansion

\begin{equation*}
\begin{tabular}{@{}ccccccccc}
\hline\hline
\multicolumn{9}{c}{Bandwidth Parameters: $\bar{h}=T^{-1/(2.8)},$ $h=T^{-1/5}$%
} \\ \hline
Sample size & \multicolumn{8}{c}{DGPs} \\ \hline
\multicolumn{1}{r}{} & \multicolumn{2}{c}{DGP 0} & \multicolumn{2}{c}{DGP 1}
& \multicolumn{2}{c}{DGP 2} & \multicolumn{2}{c}{DGP 3} \\ \cline{2-9}
\multicolumn{1}{r}{} & ST test & NHKJ test & ST test & NHKJ test & ST test & 
NHKJ test & ST test & NHKJ test \\ \cline{2-9}
\multicolumn{1}{l}{$T=100$} & 0.058 & 0.049 & 0.158 & 0.092 & 0.341 & 0.115
& 0.343 & 0.109 \\ 
\multicolumn{1}{l}{$T=200$} & 0.051 & 0.047 & 0.237 & 0.236 & 0.415 & 0.335
& 0.503 & 0.286 \\ 
\multicolumn{1}{l}{$T=300$} & 0.050 & 0.049 & 0.356 & 0.455 & 0.588 & 0.614
& 0.635 & 0.565 \\ 
\multicolumn{1}{l}{$T=400$} & 0.053 & 0.053 & 0.605 & 0.614 & 0.763 & 0.778
& 0.822 & 0.781 \\ 
\multicolumn{1}{l}{$T=500$} & 0.048 & 0.054 & 0.757 & 0.760 & 0.902 & 0.911
& 0.905 & 0.899 \\ 
\multicolumn{1}{l}{$T=1000$} & 0.051 & 0.049 & 0.995 & 0.989 & 1.000 & 1.000
& 1.000 & 0.998 \\ \hline\hline
\end{tabular}%
\end{equation*}%
\noindent \textbf{Note}$\text{: }${\small This table reports and compares
the empirical size and power of our local bootstrap-based test (ST test) and
Nishiyama et al.'s (2011) test (NHKJ test) for testing Granger non-causality
in mean from }${\small Y}${\small \ to }${\small X}${\small \ at }${\small %
\alpha =5\%}${\small \ significance level based on }${\small 1000}${\small \
replications. The data generating processes used in the simulation study are
reported in Table 1 of the Technical Appendix, which is published online. We
simulate (}${\small Y}_{t}{\small ,X}_{t}${\small ), for }${\small %
t=1,\ldots ,T,}${\small \ under the assumption that }${\small (\varepsilon }%
_{t}{\small ,\eta }_{t}{\small )}^{\prime }$ {\small are i.i.d. from }$%
{\small N(0,I}_{2}{\small )}${\small .}

%TCIMACRO{\TeXButton{\end{table}}{\end{table}}}%
%BeginExpansion
\end{table}%
%EndExpansion

Table \ref{tb: empiricalpowerbootstrapNishiyama} compares the empirical size
and power of our bootstrap-based test in Theorem \ref{bootstrap} with those
of Nishiyama et al.'s (2011) test for testing the non-causality in mean from 
$Y$\ to $X$\ at $\alpha =5\%$\ significance level. From this, we see that
the empirical size and power of the two tests are quite reasonable. Both
tests control the size and have non trivial power. We see that our test,
particularly for DGP3, has better power for relatively small samples. This
might be relevant when data scarcity happens, like in our empirical
application. For example, for $T=100$ and for DGP 1 to DGP3, the power of
Nishiyama et al.'s (2011) test is 0.092, 0.115 and 0.109, respectively,
while the power of our test is equal to 0.158, 0.341 and 0.343,
respectively. However, for large sample sizes, the empirical power catches
up to one quickly for both tests so that there is in fact no distinguishable
differences for the power performance of the two tests.

\section{Nonlinear predictability of risk premium \label{sec: Empirical
applications}}

This section aims to join the recent vast literature and study the
predictive power of \textit{variance risk premium} for the expected stock
excess returns. The variance risk premium is defined as the difference
between the risk-neutral and objective expectations of realized variance,
where the risk-neutral expectation of variance is measured as the
end-of-month Volatility Index-squared de-annualized, and the realized
variance is the sum of squared 5-minute log returns of the S\&P 500 index
over the month.

Recently, many papers have shown the importance of using variance risk
premium for predicting expected stock and bond returns and exchange rates;
see Bollerslev et al. (2009), Wang et al. (2013), Bollerslev et al. (2014),
and Della Corte et al. (2014). For the post-1990 period, Bollerslev et al.
(2009) find that the variance risk premium is able to explain a non-trivial
fraction of the time series variation in aggregate stock market returns,
with high (low) premia predicting high (low) future returns.

Most existing works, however, focus on linear predictability. The
econometric methodology used in this context is an ordinary least squares
regression of returns onto the past of variance risk premium. In this
section, we examine \textit{nonlinear} predictability of expected stock
excess returns (risk premium) using variance risk premium. Nonparametric
Granger causality measures proposed in the previous sections do not impose
any restriction on the model linking the dependent variable (stock excess
return) to the independent variable (variance risk premium).

\subsection{Variance risk premium}

In this subsection, we define the variance risk premium (VRP) that we use as
a predictor of risk premium. To do so, we need to define the model-free
realized and implied variances.

Let us first set some notations. We denote by $p_{t}$ the logarithmic price
of risky asset at time $t$, and by $r_{t+1}=p_{t+1}-p_{t}$ the continuously
compounded return from time $t$ to $t+1$ . We implicitly assume that the
price process could belong to the class of continuous-time jump diffusion
processes,%
\begin{equation}
dp_{t}=\mu _{t}dt+\sigma _{t}dW_{t}+\kappa _{t}dq_{t},\,\text{ }0\leq t\leq
T,\,  \label{eq1}
\end{equation}%
where $\mu _{t}$ is a continuous and locally bounded variation process, $%
\sigma _{t}$ is the stochastic volatility process, $W_{t}$ denotes a
standard Brownian motion, $dq_{t}$ is a counting process such that $dq_{t}$ $%
=1$ represents a jump at time $t$ (and $dq_{t}=0$ no jump) with jump
intensity $\lambda _{t}$. The parameter $\kappa _{t}$ refers to the size of
the jumps. Further, we normalize the time-interval to unity and we divide it
into $h$ periods. Each period has length $\Delta $ $=1/h$. Let the
discretely sampled $\Delta $-period returns be denoted by $r_{(t,\,\Delta
)}=p_{t}-p_{t-\Delta }$. The realized variance over the discrete $t$ to $t+1$
time interval is defined as the summation of the $h$ high-frequency
intradaily squared returns:%
\begin{equation*}
RV_{t,t+1}\equiv \sum_{j=1}^{h}r_{(t+j\Delta ,\,\Delta )}^{2}
\end{equation*}%
and it satisfies%
\begin{equation}
\underset{\Delta \rightarrow 0}{\lim }\text{ }RV_{t,t+1}=Var_{t,t+1},\,
\label{realized volatility}
\end{equation}%
where $Var_{t,t+1}$ is the variance of stock excess return between time $t$
and $t+1.$ Equation (\ref{realized volatility}) indicates that the realized
variance is a consistent estimator of the true variance of stock excess
return; see Andersen and Bollerslev (1998), Andersen et al. (2001, 2010),
Barndorff-Nielsen and Shephard (2002a), Barndorff-Nielsen and Shephard
(2002b), and Comte and Renault (1998).

We now define the model-free implied variance. Let $C_{t}(T,K)$ denote the
price of a European call option with time to maturity $T$ and strike price $%
K $, and $B(t,T)$ denotes the price of a time $t$ zero-coupon bond maturing
at time $T$. Carr and Madan (1998), Demeterfi et al. (1999) and
Britten-Jones and Neuberger (2000), have shown that implied variance between
time $t$ and $t+1$, say $IV_{t,t+1}$, can be replicated by a portfolio of
European calls as follows:%
\begin{equation}
IV_{t,t+1}\equiv E_{t}^{\mathbb{Q}}\left( Var_{t,t+1}\right)
=2\int_{0}^{\infty }\frac{1}{K^{2}}\left[ C_{t}(t+1,\frac{K}{B(t,t+1)}%
)-C_{t}(t,K)\right] dK,  \label{impliedvolatility}
\end{equation}%
where \textquotedblleft $E_{t}^{\mathbb{Q}}$\textquotedblright\ denotes the
conditional expectation with respect to risk-neutral probability, see also
Bakshi and Madan (2000). Equation (\ref{impliedvolatility}) depends on an
increasing number of calls with strikes spanning zero to infinity. In
practice $IV_{t,t+1}$ must be constructed on the basis of a finite number of
strikes. Several recent works have argued that even with relatively few
different option strikes this tends to provide a fairly accurate
approximation to the true risk-neutral expectation of the future market
variance; for review see Jiang and Tian (2005), Carr and Wu (2009), and
Bollerslev et al. (2011).

We now use the above model-free realized and implied variances to define the
variance risk premium, which is theoretically equal to the difference
between the ex-ante risk neutral expectation of the future stock return
variance and the expectation of stock return variance between time $t$ and $%
t+1$:%
\begin{equation}
VRP_{t}\equiv E_{t}^{\mathbb{Q}}\left( Var_{t,t+1}\right) -E_{t}^{\mathbb{P}%
}\left( Var_{t,t+1}\right) ,  \label{VRP}
\end{equation}%
where \textquotedblleft $E_{t}^{\mathbb{P}}$\textquotedblright\ denotes the
conditional expectation with respect to physical probability. $VRP_{t}$ in
Equation (\ref{VRP}) is unobservable, since the quantities $E_{t}^{\mathbb{Q}%
}\left( Var_{t,t+1}\right) $ and $E_{t}^{\mathbb{P}}\left(
Var_{t,t+1}\right) $ are unobservable. Estimating $VRP_{t}$ depends on the
estimation of risk neutral and physical expectations:%
\begin{equation*}
\widehat{VRP}_{t}\equiv \hat{E}_{t}^{\mathbb{Q}}\left( Var_{t,t+1}\right) -%
\hat{E}_{t}^{\mathbb{P}}\left( Var_{t,t+1}\right) .
\end{equation*}%
In practice, $\hat{E}_{t}^{\mathbb{Q}}\left( Var_{t,t+1}\right) $ and $\hat{E%
}_{t}^{\mathbb{P}}\left( Var_{t,t+1}\right) $ are commonly replaced by the
squared-Volatility Index (VIX) and the realized variance $RV_{t,t+1},$
respectively. VIX is provided by the Chicago Board Options Exchange (CBOE)
in the US, and is calculated using the near term S\&P 500 options markets.
It is based on the highly liquid S\&P500 index options along with the
\textquotedblleft model-free\textquotedblright\ approach.

In the literature there is no unique approach for constructing the physical
expectation $\hat{E}_{t}^{\mathbb{P}}\left( .\right) $. Bollerslev et al.
(2009) and Zhou (2010) have estimated a reduced-form multi-frequency
autoregression with potentially multiple lags for $\hat{E}_{t}^{\mathbb{P}%
}\left( Var_{t,t+1}\right) $. Following Bollerslev et al. (2009) and Zhou
(2010), we use time-$t$ realized variance $RV_{t,t-1}$, which ensures that
the variance risk premium proxy for predicting various risk premia is in the
time $t$ information set and would be a correct choice if the realized
variance process were unit-root.

\subsection{Empirical results}

We use monthly aggregate S\&P 500 composite index over the period January
1996 to September 2008. Our empirical analysis is based on the logarithmic
return on the S\&P 500 in excess of 3-month T-bill rate. We also consider
monthly realized variance, implied variance, and variance risk premium which
can be{\small \ }downloaded from Hao Zhou's website.

%TCIMACRO{\TeXButton{\begin{table}}{\begin{table}}}%
%BeginExpansion
\begin{table}%
%EndExpansion
\caption{Measures of causality (predictability)  from variance risk premium
to risk premium}\label{Causality Measures: comparing predictability.} 
%Table \thetable. Impact of volatility  (EGARCH-T with and without constant) of money supply growth rate on Mean of stock market return%
%TCIMACRO{\TeXButton{\small}{\small}}%
%BeginExpansion
\small%
%EndExpansion
\begin{equation*}
\begin{tabular}{lccc}
\hline\hline
Direction of Causality & Bandwidth $n^{-1/\left( 2+\delta \right) }$ & 
Estimate of Causality Measure & NHKJ Test \\ \hline
\multicolumn{4}{c}{\textbf{Horizon: One Month}} \\ 
\textit{VRP}$\rightarrow $\textit{RP} &  &  &  \\ 
& \multicolumn{1}{l}{$\delta =0.6$} & 1.298\textbf{***} &  \\ 
& \multicolumn{1}{l}{$\delta =0.8$} & 1.307\textbf{***} & 1.41 \\ 
& \multicolumn{1}{l}{$\delta =1.0$} & 1.316\textbf{***} &  \\ 
\multicolumn{4}{c}{\textbf{Horizon: Three Months}} \\ 
\textit{VRP}$\rightarrow $\textit{RP} &  &  &  \\ 
& \multicolumn{1}{l}{$\delta =0.6$} & 0.436\textbf{***} &  \\ 
& \multicolumn{1}{l}{$\delta =0.8$} & 0.468\textbf{***} & 0.85 \\ 
& \multicolumn{1}{l}{$\delta =1.0$} & 0.500\textbf{***} &  \\ 
\multicolumn{4}{c}{\textbf{Horizon: Six Months}} \\ 
\textit{VRP}$\rightarrow $\textit{RP} &  &  &  \\ 
& \multicolumn{1}{l}{$\delta =0.6$} & 0.170 &  \\ 
& \multicolumn{1}{l}{$\delta =0.8$} & 0.239 & 1.82 \\ 
& \multicolumn{1}{l}{$\delta =1.0$} & 0.309\textbf{*} &  \\ 
\multicolumn{4}{c}{\textbf{Horizon: Nine Months}} \\ 
\textit{VRP}$\rightarrow $\textit{RP} & \multicolumn{1}{l}{} &  &  \\ 
& \multicolumn{1}{l}{$\delta =0.6$} & 0.000 &  \\ 
& \multicolumn{1}{l}{$\delta =0.8$} & 0.016 & 0.33 \\ 
& \multicolumn{1}{l}{$\delta =1.0$} & 0.128 &  \\ \hline\hline
\end{tabular}%
\end{equation*}

\noindent \textbf{Note}$\text{: }${\small This table reports the results of
the estimation and inference for measures of Granger causality
(predictability) from variance risk premium (VRP) to risk premium (RP), at
different horizons. \textquotedblleft ***\textquotedblright\ and
\textquotedblleft *\textquotedblright\ mean the statistical significance at }%
${\small 1\%}${\small \ and }${\small 10\%}${\small \ significance levels,
respectively. The 5\% critical value for Nishiyama et al.'s (2011) (NHKJ)
test is $14.38$. }

%TCIMACRO{\TeXButton{\end{table}}{\end{table}}}%
%BeginExpansion
\end{table}%
%EndExpansion

Table \ref{Causality Measures: comparing predictability.} presents the
results of estimating the measures of Granger causality from variance risk
premium to risk premium at horizons one month to 9 months. It also reports
the information about the statistical significance of the estimates of the
measures using the bootstrap-based test proposed in Section \ref{local
bootstrap}, as well as the NHKJ's nonparametric test for testing the null
hypothesis of Granger non-causality in mean. From this, we see that the
degree of predictability (causality) starts out fairly high at the monthly
horizon with an estimate around $1.30$ and it is significant at $1\%$ level.
This result is not in line with what have been found in Bollerslev et al.
(2009), who, using linear regression models, find that there is a very weak
predictability from VRP to risk premium at one month horizon. Thus, our
result can be interpreted as nonlinear predictability of risk premium. On
the other hand, NHKJ's test indicates that there is non-causality from VRP
to risk premium at all horizons. This might be due to the relatively large
sample sizes needed for the NHKJ test to have power.

\begin{figure}[tbph]
\begin{center}
\subfigure{\includegraphics[scale=0.80]{causalitymeasuresestimates.eps}}\\[%
0pt]
\end{center}
\caption{This figure plots the estimates of Granger causality measures from
variance risk premium (VRP) to risk premium at horizons that go from one to
9 months, and using different bandwidth parameter $\protect\delta $ (in the
figure delta). The data on the S\&P 500 market index goes from January 1996
to September 2008.}
\label{fg:degreeofpredictability}
\end{figure}

The degree of predictability is still higher (measure around $0.468$) and
statistically significant at three-month horizon, which is in line with the
findings of Bollerslev et al. (2009). However, the degree of predictability
decreases and becomes statistically insignificant after three-month horizon.
Figure \ref{fg:degreeofpredictability} shows that the predictive power of
VRP is a decreasing function of time horizon. In contrast, Bollerslev et al.
(2009) find that the degree of predictability starts out fairly low at the
monthly horizon, rising to its maximum around a quarter, gradually tapering
off thereafter for longer return horizons. Hence, unlike Bollerslev et al.
(2009), we find a high degree of predictability at one-month horizon which
can be attributed to a nonlinear causal effect from VRP to risk premium.

\section{Conclusion \label{sec: Conclusion}}

In this paper, we extended the existing \emph{parametric} measures of
Granger causality in mean [see Geweke (1982, 1984) and Dufour and Taamouti
(2010)] by proposing \emph{nonparametric} measures that are able to detect
and quantify nonlinear Granger causality in mean between univariate and
multivariate random variables. The new measures are model-free, therefore
they do not require the specification of model that links the variables of
interest.

The proposed causality measures are defined as a logarithmic function of
restricted and unrestricted mean square forecast errors. To consistently
estimate these measures, it suffices to find consistent estimates of the
above mean square forecast errors. The latter are defined using
Nadaraya-Watson kernel estimators. Since testing for the statistical
significance of measures is also indispensable in time series analysis, we
derived the asymptotic normality of nonparametric estimator of measures that
we used to build valid tests. We also established the validity of smoothed
local bootstrap that one can use in finite sample settings to perform
statistical tests. Monte Carlo simulation study has been performed to
investigate the finite sample properties (size and power) of the proposed
test and the results reveal that the latter behaves well for a variety of
typical data generating processes.

Using the above nonparametric test for testing the null hypothesis that the
true value of measure is equal to zero is equivalent to testing for
non-causality in mean. Thus, our test can be viewed as a competitor of the
exiting nonparametric tests of Granger causality in mean. There is only one
nonparametric test of Granger causality in mean which is proposed by
Nishiyama et al. (2011). We considered an additional simulation exercise to
compare the empirical size and power of our test with those of Nishiyama et
al.'s (2011) test. Simulation results indicate that our test has comparable
size, but better power than Nishiyama et al.'s (2011) test.

Finally, we applied our nonparametric measures to quantify the degree of
nonlinear predictability of risk premium using variance risk premium. The
latter is defined as difference between risk-neutral and objective
expectations of realized variance, where the risk-neutral expectation of
variance is measured as the end-of-month volatility index-squared
de-annualized and the realized variance is the sum of squared 5-minute log
returns of the S\&P 500 index over the month. Our results showed that the
variance risk premium is a good predictor of risk premium at horizons less
than six months. Unlike Bollerslev et al. (2009), we found that there is a
high degree of predictability at horizon one-month which can be attributed
to a nonlinear causal effect.

\begin{thebibliography}{99}
\bibitem{} Andersen, T. G., and Bollerslev, T. (1998), \textquotedblleft
Answering the Skeptics: Yes, Standard Volatility Models Do Provide Accurate
Forecasts,\textquotedblright\ \textit{International Economic Review,} 39,
885--905.

\bibitem{} Andersen, T. G., Bollerslev, T., Diebold, F. X., and Labys, P.
(2001), \textquotedblleft The Distribution of Realized Exchange Rate
Volatility,\textquotedblright\ \textit{Journal of the American Statistical
Association,} 96, 42--55.

\bibitem{} Andersen, T. G., Bollerslev, T., and Diebold, F. X. (2010),
\textquotedblleft Parametric and Nonparametric Volatility
Measurement,\textquotedblright\ In Y. A\"{\i}t-Sahalia and L. P. Hansen
(eds.), Handbook of Financial Econometrics. Volume 1-Tools and Techniques,
chapter 2, 67--138. Amsterdam: Elsevier.

\bibitem{} Bakshi, G., and Madan, D. (2000), \textquotedblleft Spanning and
Derivative-Security Valuation,\textquotedblright\ \textit{Journal of
Financial Economics}, 55, 205--238.

\bibitem{} Barndorff-Nielsen, O. E., and Shephard, N. (2002a),
\textquotedblleft Econometric Analysis of Realised Volatility and Its Use in
Stochastic Volatility Models,\textquotedblright\ \textit{Journal of the
Royal Statistical Society}, Series B, 64, 253--280.

\bibitem{} Barndorff-Nielsen, O. E., and Shephard, N. (2002b),
\textquotedblleft Estimating Quadratic Variation Using Realized
Variance,\textquotedblright\ \textit{Journal of Applied Econometrics,} 17,
457--478.

\bibitem{} Bollerslev, T., Gibson, M., and Zhou, H. (2011),
\textquotedblleft Dynamic Estimation of Volatility Risk Premia and Investor
Risk Aversion From Option-Implied and Realized
Volatilities,\textquotedblright\ \textit{Journal of Econometrics}, 160,
235--245.

\bibitem{} Bollerslev, T., \ Marrone, J., Xu, L., and Zhou, H. (2014),
\textquotedblleft Stock Return Predictability and Variance Risk Premia:
Statistical Inference and International Evidence,\textquotedblright\ \textit{%
Journal of Financial and Quantitative Analysis, }49, 633--661.

\bibitem{} Bollerslev, T., Tauchen, G., and Zhou, H. (2009),
\textquotedblleft Expected Stock Returns and Variance Risk
Premia,\textquotedblright\ \textit{Review of Financial Studies}, 22,
4463--4492.

\bibitem{} Britten-Jones, M., and Neuberger, A. (2000), \textquotedblleft
Option Prices, Implied Price Processes, and Stochastic
Volatility,\textquotedblright\ \textit{Journal of Finance}, 55, 839--866.

\bibitem{} Brock, W. (1991), \textquotedblleft Causality, Chaos, Explanation
and Prediction in Economics and Finance,\textquotedblright\ in J. Casti and
A. Karlqvist, Eds.: Beyond Belief: Randomness, Prediction and Explanation in
Science (CRC Press, Boca Raton, Fla.)

\bibitem{} Carr, P., and Madan, D. (1998), \textquotedblleft Towards a
Theory of Volatility Trading,\textquotedblright\ in Volatility: New
Estimation Techniques for Pricing Derivatives, chap.29, 417--427, Robert
Jarrow (ed.). London: Risk Books.

\bibitem{} Carr, P., and Wu, L. (2009), \textquotedblleft Variance Risk
Premiums,\textquotedblright\ \textit{Review of Financial Studies}, 22,
1311--1341.

\bibitem{} Comte, F., and Renault, E. (1998), \textquotedblleft Long Memory
in Continuous Time Stochastic Volatility Models,\textquotedblright\ \textit{%
Mathematical Finance,} 8, 291--323.

\bibitem{} Della Corte, P., Ramadorai, T., and Sarno, L. (2014),
\textquotedblleft Volatility Premia and\ Exchange Rate
Predictability,\textquotedblright\ \textit{Journal of Financial Economics}, 
\textit{forthcoming}.

\bibitem{} Demeterfi, K., Derman, E., Kamal, M., and Zou, J. (1999),
\textquotedblleft A Guide to Volatility and Variance
Swaps,\textquotedblright\ \textit{Journal of Derivatives,} 6, 9--32.

\bibitem{} Dufour, J.-M., and Taamouti, A. (2010), \textquotedblleft Short
and Long Run Causality Measures: Theory and Inference,\textquotedblright\ 
\textit{Journal of Econometrics}, 154, 42--58.

\bibitem{} Gao, J., and Gijbels, I. (2008), \textquotedblleft Bandwidth
Selection in Nonparametric Kernel Testing,\textquotedblright\ \textit{%
Journal of the American Statistical Association}, 103, 1584--1594.

\bibitem{} Geweke, J. (1982), \textquotedblleft Measurement of Linear
Dependence and Feedback Between Multiple Time Series,\textquotedblright\ 
\textit{Journal of the American Statistical Association}, 77, 304--313.

\bibitem{} Geweke, J. (1984), \textquotedblleft Measures of Conditional
Linear Dependence and Feedback Between Time Series,\textquotedblright\ 
\textit{Journal of the American Statistical Association}, 79, 907--915.

\bibitem{} Gouri\'{e}roux, C., Monfort, A., and Renault, E. (1987),
\textquotedblleft Kullback Causality Measures,\textquotedblright\ \textit{%
Annales d'\'{E}conomie et de Statistique,} 6/7, 369--410.

\bibitem{} Granger, C. W. J. (1969), \textquotedblleft Investigating Causal
Relations by Econometric Models and Cross-Spectral
Methods,\textquotedblright\ \textit{Econometrica}, 37, 424--459.

\bibitem{} Hall, P. (1984), \textquotedblleft Central Limit Theorem for
Integrated Square Error of Multivariate Nonparametric Density
Estimators,\textquotedblright\ \textit{Journal of Multivariate Analysis},
14, 1--16.

\bibitem{} H\"{a}rdle, W. (1992), \textquotedblleft Applied Nonparametric
Regression (Econometric Society Monographs),\textquotedblright\ Cambridge
University Press.

\bibitem{} Horowitz, J. L., and Spokoiny, V. G. (2001), \textquotedblleft
Adaptive, Rate-Optimal Test of a Parametric Mean-Regression Model Against a
Nonparametric Alternatives,\textquotedblright\ \textit{Econometrica}, 69,
599--631.

\bibitem{} Jiang, G., and Tian, Y. (2005), \textquotedblleft Model-Free
Implied Volatility and Its Information Content,\textquotedblright\ \textit{%
Review of Financial Studies}, 18, 1305--1342.

\bibitem{} Li, Q.,Lin, J., and Racine, J. S. (2013), \textquotedblleft
Optimal Bandwidth Selection for Nonparametric Conditional Distribution and
Quantile Functions,\textquotedblright\ \textit{Journal of Business and
Economic Statistics}, 31, 57--65.

\bibitem{} Li, Q., Maasoumi, E., and Racine, J. S. (2009), \textquotedblleft
A Nonparametric Test for Equality of Distributions with Mixed Categorical
and Continuous Data,\textquotedblright\ \textit{Journal of Econometrics},
148, 186--200.

\bibitem{} McCloskey, D. N., and Ziliak, S. (1996), \textquotedblleft The
Standard Error of Regressions,\textquotedblright\ \textit{The Journal of
Economic Literature}, XXXIV, 97--114.

\bibitem{} M\"{u}ller, U., Schick, A., and Wefelmeyer, W. (2003),
\textquotedblleft Estimating the Error Variance in Nonparametric Regression
by a Covariate-Matched U-Statistic,\textquotedblright\ \textit{Statistics},
37, 179--188.

\bibitem{} Nadaraya, E. A. (1964), \textquotedblleft On Estimating
Regression,\textquotedblright\ \textit{Theory of Probability and its
Applications}, 9, 141--142.

\bibitem{} Nishiyama, Y., Hitomi, K., Kawasaki, Y., and Jeong, K. (2011),
\textquotedblleft A Consistent Nonparametric Test for Nonlinear
Causality-Specification in Time Series Regression,\textquotedblright\ 
\textit{Journal of Econometrics}, 165, 112--127.

\bibitem{} Paparoditis, E., and Politis, D. (2000), \textquotedblleft The
Local Bootstrap for Kernel Estimators Under General Dependence
Conditions,\textquotedblright\ \textit{Annals of the Institute of
Statistical Mathematics}, 52, 139--159.

\bibitem{} Polasek, W. (1994), \textquotedblleft Temporal Causality Measures
Based on AIC,\textquotedblright\ \textit{in H. Bozdogan, ed., Proceedings of
the Frontier of Statistical Modeling: An Informal Approach}, Kluwer,
Dordrecht, The Netherlands, 159--168.

\bibitem{} Polasek, W. (2002), \textquotedblleft Bayesian Causality Measures
for Multiple ARCH Models Using Marginal Likelihoods,\textquotedblright\ 
\textit{Technical report}, Institute of Statistics and Econometrics,
Univeristy of Basel., Switzerland.

\bibitem{} Robinson, P. M. (1988), \textquotedblleft Root-N-Consistent
Semiparametric Regression,\textquotedblright\ \textit{Econometrica}, 56,
931--954.

\bibitem{} Spokoiny, V. (2002), \textquotedblleft Variance Estimation for
High-Dimensional Regression Models,\textquotedblright\ \textit{Journal of
Multivariate Analysis}, 82, 111--133.

\bibitem{} Taamouti, A., Bouezmarni, T., and El Ghouch, A. (2014),
\textquotedblleft Nonparametric Estimation and Inference for Granger
Causality Measures,\textquotedblright\ \textit{Journal of Econometrics, }%
180, 251--264.

\bibitem{} Tenreiro, C. (1997), \textquotedblleft Loi Asymptotique des
Erreurs Quadratiques Int\'{e}gr\'{e}es des Estimateurs a Noyau de la Densit%
\'{e} et de la R\'{e}gression Sous des Conditions de D\'{e}%
pendance,\textquotedblright\ \textit{Portugaliae Mathematica}, 54, 197--213.

\bibitem{} Wang, H., Zhou, H., and Zhou, Y. (2013), \textquotedblleft Credit
Default Swap Spreads and Variance Risk Premia,\textquotedblright\ \textit{%
Journal of Banking and Finance, }37, 3733--3746.

\bibitem{} Watson, G. S. (1964), \textquotedblleft Smooth Regression
Analysis,\textquotedblright\ \textit{Sankya, Series A}, 26, 359--372.

\bibitem{} White, H. (2000), \textquotedblleft Asymptotic Theory for
Econometricians,\textquotedblright\ 2nd Edition, New York: Academic Press.

\bibitem{} Wiener, N. (1956), \textquotedblleft The Theory of
Prediction,\textquotedblright\ \textit{in E. F. Beckenback, ed., The Theory
of Prediction}, McGraw-Hill, New York, chapter 8.

\bibitem{} Zhou, H. (2010), \textquotedblleft Variance Risk Premia, Asset
Predictability Puzzles, and Macroeconomic Uncertainty,\textquotedblright\ 
\textit{Federal Reserve Board} \textit{Working Paper.}
\end{thebibliography}

\end{document}
